# Supplementary material for: Evaluation of electron or charge transfer processes between chromenylium-based fluorophores and protonated–deprotonated aniline
Source: Royal Society of Chemistry journal article supplement (doi:10.1039/c6ra19831g), 2016-01-01
Supplement: c6ra19831g1.pdf [file c6ra19831g1.pdf]

## Evaluation of electron or charge transfer processes between chromenylium-based fluorophores and protonated-deprotonated aniline

Jin-Wei Xiao,<sup>a</sup> Wei-Jin Zhu,<sup>a</sup> Ru Sun,<sup>\*a</sup> Yu-Jie Xu,<sup>b</sup> and Jian-Feng Ge <sup>\*a</sup>

<sup>a</sup>. College of Chemistry, Chemical Engineering and Material Science, State and Local Joint Engineering Laboratory for Novel Functional Polymeric Materials, Soochow University, 199 Ren' Ai Road, Suzhou 215123, China. E-mail: sunru924@hotmail.com, ge\_jianfeng@hotmail.com.

<sup>b</sup>. School of Radiation Medicine and Protection, Medicine College of Soochow University, Suzhou 215123, China.

### Index

|                                                                                                                                                                                                                                                                                                                                                                                                                                                                                                                                                                                                                               |    |
|-------------------------------------------------------------------------------------------------------------------------------------------------------------------------------------------------------------------------------------------------------------------------------------------------------------------------------------------------------------------------------------------------------------------------------------------------------------------------------------------------------------------------------------------------------------------------------------------------------------------------------|----|
| <b>1. Figures</b> .....                                                                                                                                                                                                                                                                                                                                                                                                                                                                                                                                                                                                       | S3 |
| <b>Fig. S1</b> <sup>1</sup> H NMR of dyes <b>1a-b</b> in DMSO- <i>d</i> <sub>6</sub> (top) and the acidic condition (bottom). (a) dye <b>1a</b> ; (b) dye <b>1b</b> .<br>.....                                                                                                                                                                                                                                                                                                                                                                                                                                                | S3 |
| <b>Fig. S2</b> The resonance equilibrium of <b>1a</b> <sup>+</sup> (a) and frontier molecular orbitals (FMOs) involved in the vertical excitation and emission of dyes <b>1a</b> <sup>+</sup> - <i>i</i> (b) and <b>1a</b> <sup>+</sup> - <i>ii</i> (c). CT stands for conformation transformation. Excitation and radiative processes are represented by solid lines and the nonradiative processes by dotted lines. For details please refer to Tables S2 and S3.....                                                                                                                                                       | S4 |
| <b>Fig. S3</b> The resonance equilibrium of <b>1b</b> <sup>+</sup> (a) and frontier molecular orbitals (FMOs) involved in the vertical excitation and emission of dyes <b>1b</b> <sup>+</sup> - <i>i</i> (b) and <b>1b</b> <sup>+</sup> - <i>ii</i> (c). CT stands for conformation transformation. Excitation and radiative processes are represented by solid lines and the nonradiative processes by dotted lines. For details please refer to Tables S2 and S3.....                                                                                                                                                       | S5 |
| <b>Fig. S4</b> Fluorescence responses of dye <b>1a</b> (10 μM) to different analytes, K <sup>+</sup> (100 mM), Na <sup>+</sup> (100 mM), Ca <sup>2+</sup> (0.5 mM), Mg <sup>2+</sup> (0.5 mM), Cd <sup>2+</sup> (0.3 mM), Cu <sup>2+</sup> (0.3 mM), Co <sup>2+</sup> (0.3 mM), Hg <sup>2+</sup> (0.3 mM), Mn <sup>2+</sup> (0.3 mM), Ni <sup>2+</sup> (0.3 mM), Cys (0.1 mM), Phe (0.1 mM), Gly (0.1 mM), Glu (0.1 mM), Arg (0.1 mM), Lys (0.1 mM), Pro (0.1 mM), Try (0.1 mM) and His (0.1 mM) were included: (a, c) tested in Britton-Robinson Buffer (pH = 7.0); (b, d) tested in Britton-Robinson Buffer (pH = 3.0)..... | S6 |
| <b>Fig. S5</b> Fluorescence responses of dye <b>1b</b> (10 μM) to different analytes, K <sup>+</sup> (100 mM), Na <sup>+</sup> (100 mM), Ca <sup>2+</sup> (0.5 mM), Mg <sup>2+</sup> (0.5 mM), Cd <sup>2+</sup> (0.3 mM), Cu <sup>2+</sup> (0.3 mM), Co <sup>2+</sup> (0.3 mM), Hg <sup>2+</sup> (0.3 mM), Mn <sup>2+</sup> (0.3 mM), Ni <sup>2+</sup> (0.3 mM), Cys (0.1 mM), Phe (0.1 mM), Gly (0.1 mM), Glu (0.1 mM), Arg (0.1 mM), Lys (0.1 mM), Pro                                                                                                                                                                      |    |

|                                                                                                                                                                                                                                        |     |
|----------------------------------------------------------------------------------------------------------------------------------------------------------------------------------------------------------------------------------------|-----|
| (0.1 mM), Try (0.1 mM) and His (0.1 mM) were included: (a, c) tested in Britton-Robinson Buffer (pH = 7.0); (b, d) tested in Britton-Robinson Buffer (pH = 2.0).....                                                                   | S7  |
| <b>Fig. S6</b> The reversible optical responses of dyes <b>1a-b</b> at different pH conditions: (a) dye <b>1a</b> ; (b) dye <b>1b</b> . .                                                                                              | S7  |
| 2. Tables .....                                                                                                                                                                                                                        | S8  |
| <b>Table S1.</b> Stability of different conjugated structures of dyes <b>1a<sup>+</sup>-c<sup>+</sup></b> and their protonated forms. ....                                                                                             | S8  |
| <b>Table S2</b> Selected parameters for the vertical excitation (UV-vis absorptions) of dyes <b>1a<sup>+</sup>-c<sup>+</sup></b> and <b>1c<sup>+</sup>+H<sup>+</sup></b> based on the optimized ground state geometries in water. .... | S9  |
| <b>Table S3</b> Selected parameters for emission related of dyes <b>1a<sup>+</sup>-c<sup>+</sup></b> and <b>1c<sup>+</sup>+H<sup>+</sup></b> based on the optimized lowest singlet excited state geometries in water. ....             | S10 |
| 4. Appendix .....                                                                                                                                                                                                                      | S11 |
| <b>Fig. S7</b> <sup>1</sup> H NMR of <b>3</b> . ....                                                                                                                                                                                   | S11 |
| <b>Fig. S8</b> <sup>13</sup> C NMR of <b>3</b> . ....                                                                                                                                                                                  | S11 |
| <b>Fig. S9</b> HRMS(ESI <sup>+</sup> ) of <b>3</b> . ....                                                                                                                                                                              | S12 |
| <b>Fig. S10</b> <sup>1</sup> H NMR of <b>4</b> . ....                                                                                                                                                                                  | S13 |
| <b>Fig. S11</b> <sup>13</sup> C NMR of <b>4</b> . ....                                                                                                                                                                                 | S13 |
| <b>Fig. S12</b> HRMS(ESI <sup>+</sup> ) of <b>4</b> . ....                                                                                                                                                                             | S14 |
| <b>Fig. S13</b> <sup>1</sup> H NMR of <b>5</b> . ....                                                                                                                                                                                  | S15 |
| <b>Fig. S14</b> <sup>13</sup> C NMR of <b>5</b> . ....                                                                                                                                                                                 | S15 |
| <b>Fig. S15</b> HRMS(ESI <sup>+</sup> ) of <b>5</b> .....                                                                                                                                                                              | S16 |
| <b>Fig. S16</b> <sup>1</sup> H NMR of <b>6</b> . ....                                                                                                                                                                                  | S17 |
| <b>Fig. S17</b> <sup>13</sup> C NMR of <b>6</b> . ....                                                                                                                                                                                 | S17 |
| <b>Fig. S18</b> HRMS(ESI <sup>+</sup> ) of <b>6</b> . ....                                                                                                                                                                             | S18 |
| <b>Fig. S19</b> <sup>1</sup> H NMR of dye <b>1a</b> . ....                                                                                                                                                                             | S19 |
| <b>Fig. S20</b> <sup>13</sup> C NMR of dye <b>1a</b> . ....                                                                                                                                                                            | S19 |
| <b>Fig. S21</b> HRMS(ESI <sup>+</sup> ) of dye <b>1a</b> .....                                                                                                                                                                         | S20 |
| <b>Fig. S22</b> <sup>1</sup> H NMR of dye <b>1b</b> . ....                                                                                                                                                                             | S21 |
| <b>Fig. S23</b> <sup>13</sup> C NMR of dye <b>1b</b> . ....                                                                                                                                                                            | S21 |
| <b>Fig. S24</b> HRMS(ESI <sup>+</sup> ) of dye <b>1b</b> .....                                                                                                                                                                         | S22 |
| <b>Fig. S25</b> <sup>1</sup> H NMR of dye <b>1c</b> .....                                                                                                                                                                              | S23 |
| <b>Fig. S26</b> <sup>13</sup> C NMR of dye <b>1c</b> .....                                                                                                                                                                             | S23 |
| <b>Fig. S27</b> HRMS(ESI <sup>+</sup> ) of dye <b>1c</b> . ....                                                                                                                                                                        | S24 |

## 1. Figures

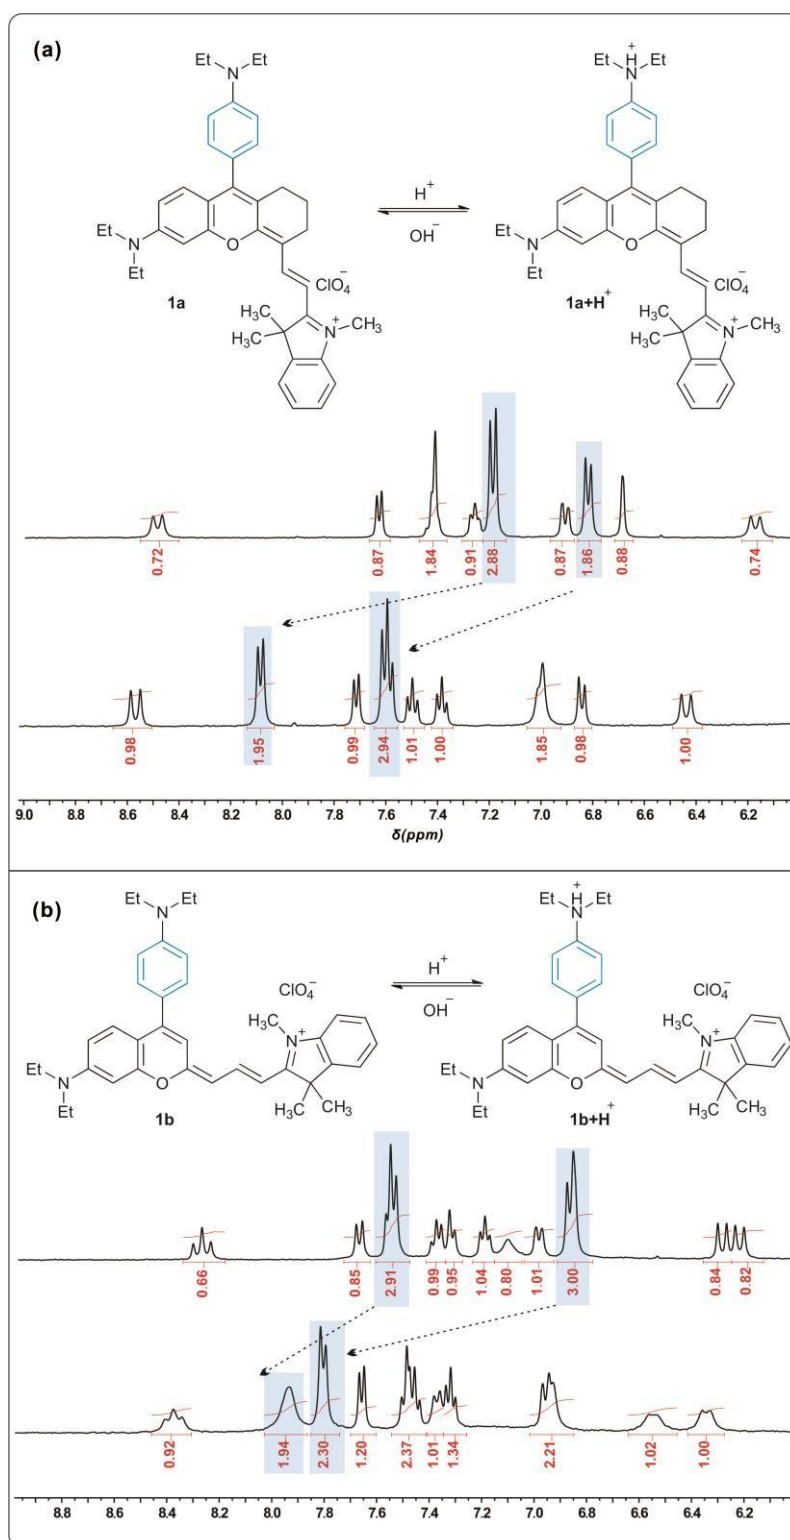

**Fig. S1**  $^1\text{H}$  NMR of dyes **1a-b** in DMSO- $d_6$  (top) and the acidic condition (bottom). (a) dye **1a**; (b) dye **1b**.

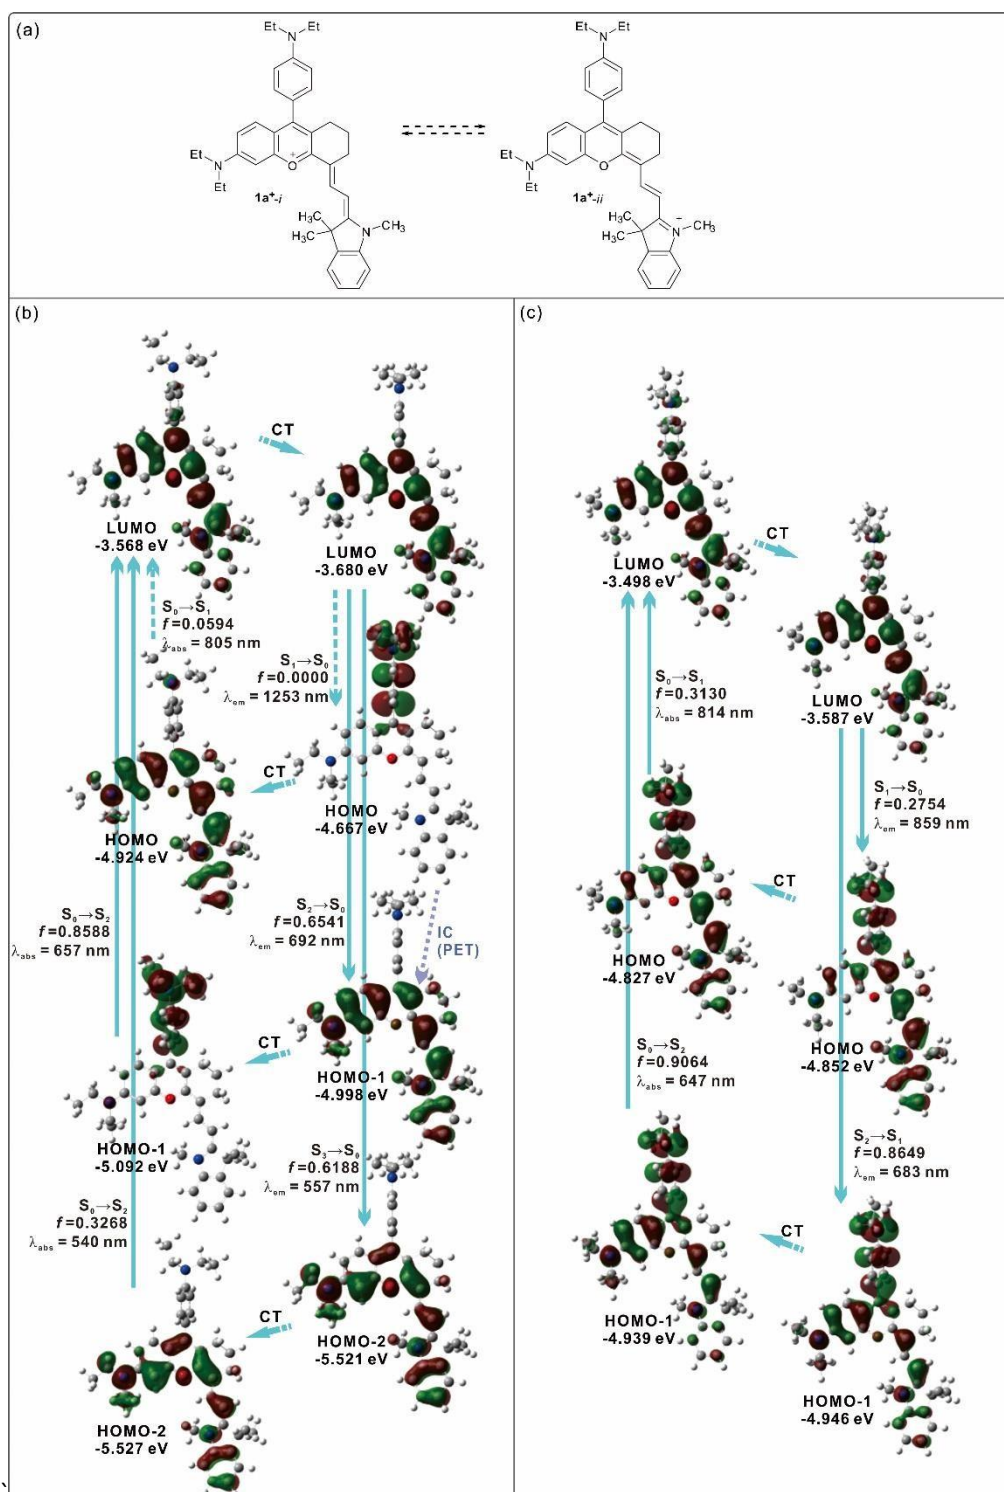

**Fig. S2** The resonance equilibrium of  $1a^+$  (a) and frontier molecular orbitals (FMOs) involved in the vertical excitation and emission of dyes  $1a^{+i}$  (b) and  $1a^{+ii}$  (c). CT stands for conformation transformation. Excitation and radiative processes are represented by solid lines and the nonradiative processes by dotted lines. For details please refer to Tables S2 and S3.

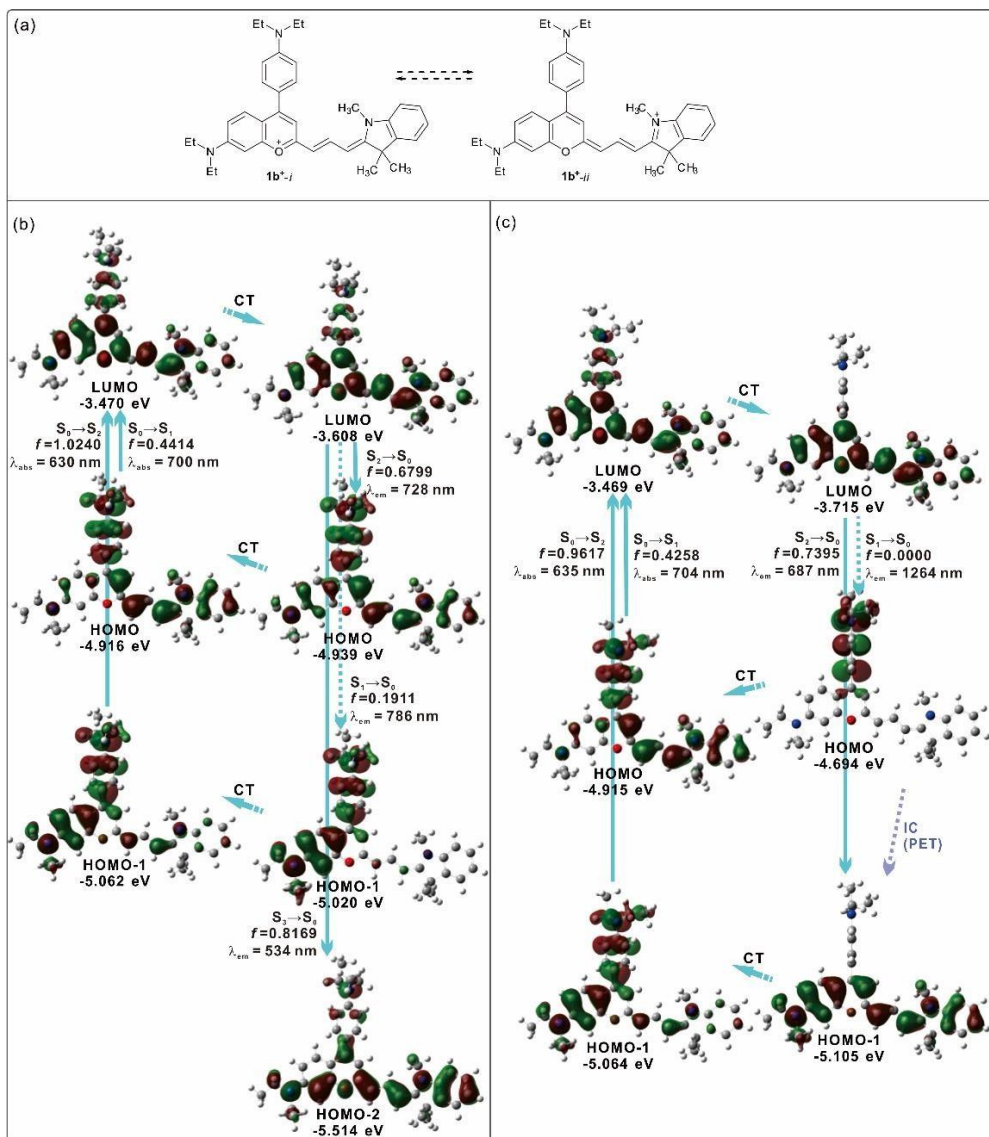

**Fig. S3** The resonance equilibrium of  $1b^{+}$  (a) and frontier molecular orbitals (FMOs) involved in the vertical excitation and emission of dyes  $1b^{+i}$  (b) and  $1b^{+ii}$  (c). CT stands for conformation transformation. Excitation and radiative processes are represented by solid lines and the nonradiative processes by dotted lines. For details please refer to Tables S2 and S3.

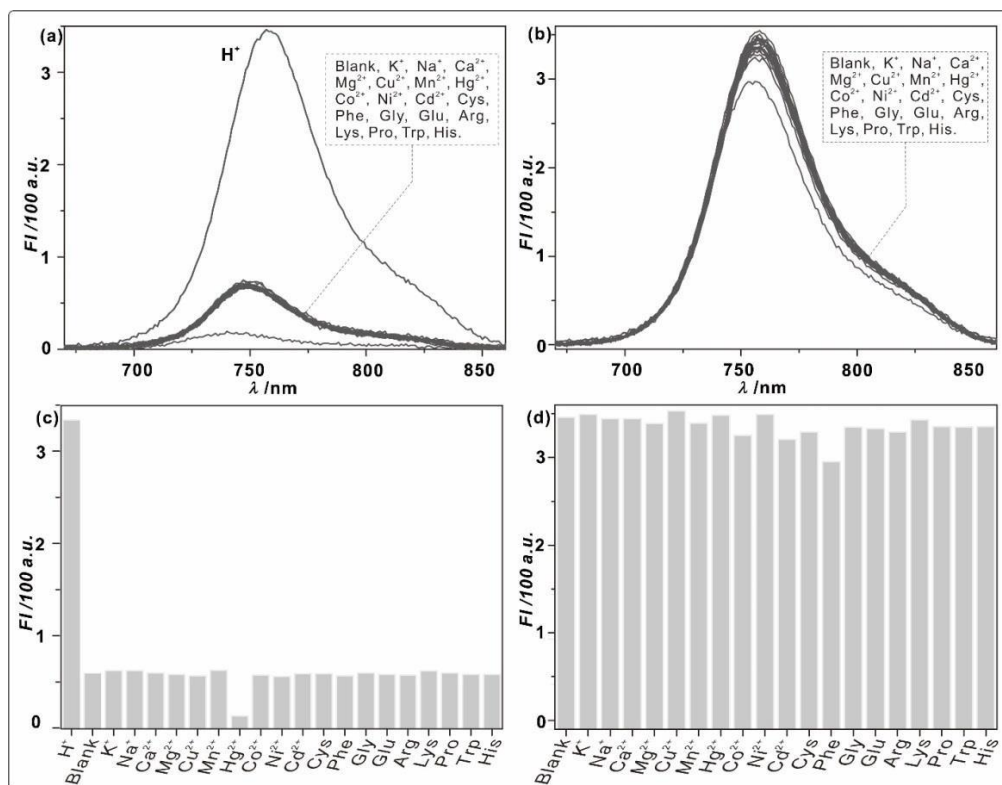

**Fig. S4** Fluorescence responses of dye **1a** (10  $\mu\text{M}$ ) to different analytes,  $\text{K}^+$  (100 mM),  $\text{Na}^+$  (100 mM),  $\text{Ca}^{2+}$  (0.5 mM),  $\text{Mg}^{2+}$  (0.5 mM),  $\text{Cd}^{2+}$  (0.3 mM),  $\text{Cu}^{2+}$  (0.3 mM),  $\text{Co}^{2+}$  (0.3 mM),  $\text{Hg}^{2+}$  (0.3 mM),  $\text{Mn}^{2+}$  (0.3 mM),  $\text{Ni}^{2+}$  (0.3 mM), Cys (0.1 mM), Phe (0.1 mM), Gly (0.1 mM), Glu (0.1 mM), Arg (0.1 mM), Lys (0.1 mM), Pro (0.1 mM), Try (0.1 mM) and His (0.1 mM) were included: (a, c) tested in Britton-Robinson Buffer (pH = 7.0); (b, d) tested in Britton-Robinson Buffer (pH = 3.0).

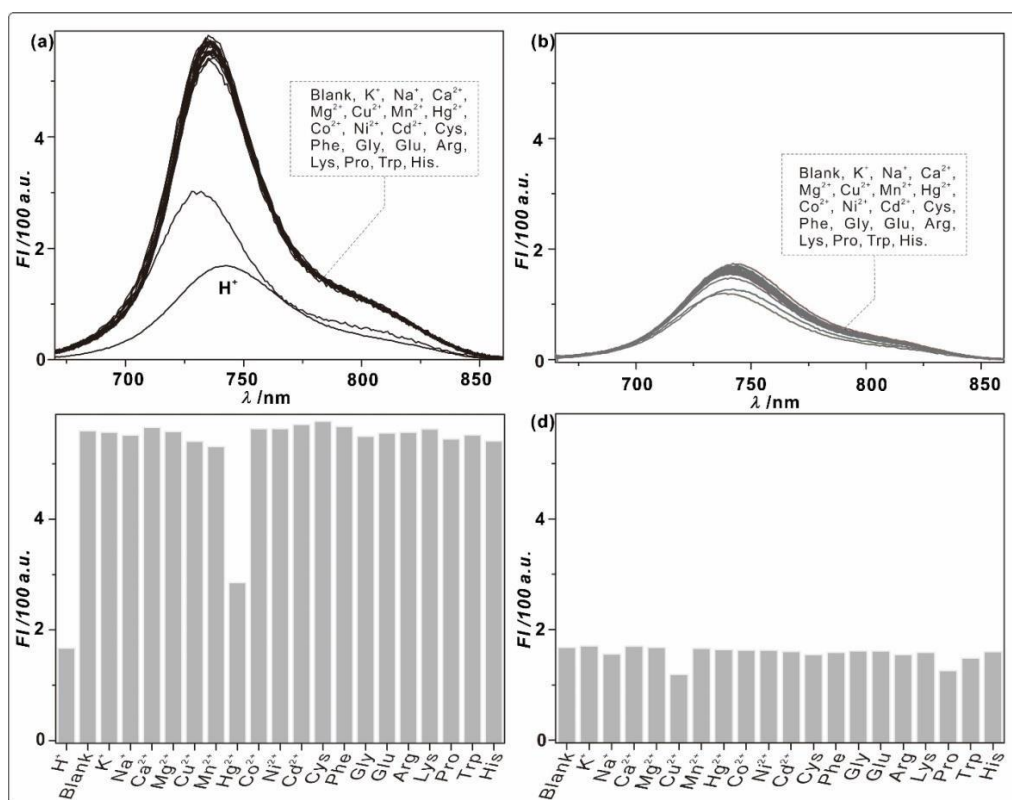

**Fig. S5** Fluorescence responses of dye **1b** (10  $\mu$ M) to different analytes,  $K^+$  (100 mM),  $Na^+$  (100 mM),  $Ca^{2+}$  (0.5 mM),  $Mg^{2+}$  (0.5 mM),  $Cd^{2+}$  (0.3 mM),  $Cu^{2+}$  (0.3 mM),  $Co^{2+}$  (0.3 mM),  $Hg^{2+}$  (0.3 mM),  $Mn^{2+}$  (0.3 mM),  $Ni^{2+}$  (0.3 mM), Cys (0.1 mM), Phe (0.1 mM), Gly (0.1 mM), Glu (0.1 mM), Arg (0.1 mM), Lys (0.1 mM), Pro (0.1 mM), Try (0.1 mM) and His (0.1 mM) were included: (a, c) tested in Britton-Robinson Buffer (pH = 7.0); (b, d) tested in Britton-Robinson Buffer (pH = 2.0).

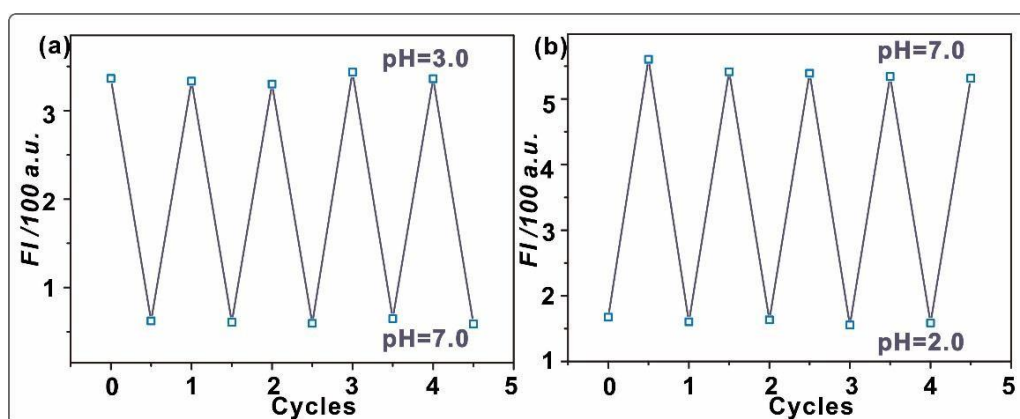

**Fig. S6** The reversible optical responses of dyes **1a-b** at different pH conditions: (a) dye **1a**; (b) dye **1b**.

## 2. Tables

**Table S1.** Stability of different conjugated structures of dyes **1a<sup>+</sup>-c<sup>+</sup>** and their protonated forms.

|             |                                |                                |                                         |                                          |
|-------------|--------------------------------|--------------------------------|-----------------------------------------|------------------------------------------|
| Structures  |                                |                                |                                         |                                          |
| Dye No.     | <b>1a<sup>+</sup>-i</b>        | <b>1a<sup>+</sup>-ii</b>       | <b>1a<sup>+</sup>-i + H<sup>+</sup></b> | <b>1a<sup>+</sup>-ii + H<sup>+</sup></b> |
| HF(hartree) | -1793.0302226                  | -1793.0418659<br><b>stable</b> | -1793.4811741<br><b>stable</b>          | -1793.4792696                            |
| Structures  |                                |                                |                                         |                                          |
| Dye No.     | <b>1b<sup>+</sup>-i</b>        | <b>1b<sup>+</sup>-ii</b>       | <b>1b<sup>+</sup>-i + H<sup>+</sup></b> | <b>1b<sup>+</sup>-ii + H<sup>+</sup></b> |
| HF(hartree) | -1676.268848                   | -1676.2689758<br><b>stable</b> | -1676.7042854<br><b>stable</b>          | -1676.7042852<br><b>stable</b>           |
| Structures  |                                |                                |                                         |                                          |
| Dye No.     | <b>1c<sup>+</sup>-i</b>        | <b>1c<sup>+</sup>-ii</b>       | <b>1c<sup>+</sup>-i + H<sup>+</sup></b> | <b>1c<sup>+</sup>-ii + H<sup>+</sup></b> |
| HF(hartree) | -1787.4815541<br><b>stable</b> | -1787.4815541<br><b>stable</b> | -1787.9135717<br><b>stable</b>          | -1787.9135717<br><b>stable</b>           |



**Table S2** Selected parameters for the vertical excitation (UV-vis absorptions) of dyes **1a<sup>+</sup>-c<sup>+</sup>** and **1c<sup>+</sup>+H<sup>+</sup>** based on the optimized ground state geometries in water.

| dyes                                       | Electronic transitions                                                              | Excitation energy              |                     | $\lambda_{\text{exp.}}/\text{nm}$ | $f^a$  | Composition <sup>b</sup> | CI <sup>c</sup> |          |
|--------------------------------------------|-------------------------------------------------------------------------------------|--------------------------------|---------------------|-----------------------------------|--------|--------------------------|-----------------|----------|
|                                            |                                                                                     | E/eV                           | $\lambda/\text{nm}$ |                                   |        |                          |                 |          |
| <b>1a<sup>+</sup>-i</b>                    | S <sub>0</sub> →S <sub>1</sub>                                                      | 1.54                           | 805                 | 719                               | 0.0594 | H-1→L                    | 0.68998         |          |
|                                            |                                                                                     |                                |                     |                                   |        | H→L                      | -0.15369        |          |
|                                            |                                                                                     |                                |                     |                                   |        | H→L                      | -0.15369        |          |
|                                            | S <sub>0</sub> →S <sub>2</sub>                                                      | 1.89                           | 657                 |                                   | 0.8588 | H-2→L                    | 0.17744         |          |
|                                            |                                                                                     |                                |                     |                                   |        | H-1→L                    | 0.15168         |          |
|                                            |                                                                                     |                                |                     |                                   |        | H→L                      | 0.66923         |          |
|                                            | S <sub>0</sub> →S <sub>3</sub>                                                      | 2.30                           | 540                 |                                   | 0.3268 | H-2→L                    | 0.64913         |          |
|                                            |                                                                                     |                                |                     |                                   |        | H→L                      | -0.17332        |          |
|                                            |                                                                                     |                                |                     |                                   |        | H→L+1                    | -0.21105        |          |
| <b>1a<sup>+</sup>-ii</b>                   | S <sub>0</sub> →S <sub>1</sub>                                                      | 1.52                           | 814                 | 719                               | 0.3130 | H-1→L                    | 0.47843         |          |
|                                            |                                                                                     |                                |                     |                                   |        | H→L                      | 0.52001         |          |
|                                            |                                                                                     |                                |                     |                                   |        | H→L                      | -0.13695        |          |
|                                            | S <sub>0</sub> →S <sub>2</sub>                                                      | 1.92                           | 647                 |                                   | 0.9064 | H-2→L                    | -0.13695        |          |
|                                            |                                                                                     |                                |                     |                                   |        | H-1→L                    | 0.51057         |          |
|                                            |                                                                                     |                                |                     |                                   |        | H→L                      | -0.47092        |          |
|                                            | S <sub>0</sub> →S <sub>3</sub>                                                      | 2.34                           | 530                 |                                   | 0.1881 | H-2→L                    | 0.65193         |          |
|                                            |                                                                                     |                                |                     |                                   |        | H-1→L+1                  | 0.10090         |          |
|                                            |                                                                                     |                                |                     |                                   |        | H→L+1                    | -0.21809        |          |
| <b>1b<sup>+</sup>-i</b>                    | S <sub>0</sub> →S <sub>1</sub>                                                      | 1.77                           | 700                 | 702                               | 0.4414 | H-1→L                    | -0.44875        |          |
|                                            |                                                                                     |                                |                     |                                   |        | H→L                      | 0.54037         |          |
|                                            |                                                                                     |                                |                     |                                   |        | H→L                      | 0.54037         |          |
|                                            | S <sub>0</sub> →S <sub>2</sub>                                                      | 1.97                           | 630                 |                                   | 1.0240 | H-2→L                    | 0.15884         |          |
|                                            |                                                                                     |                                |                     |                                   |        | H-1→L                    | 0.51829         |          |
|                                            |                                                                                     |                                |                     |                                   |        | H→L                      | 0.44391         |          |
|                                            | S <sub>0</sub> →S <sub>3</sub>                                                      | 2.35                           | 527                 |                                   | 0.1316 | H-2→L                    | 0.62009         |          |
|                                            |                                                                                     |                                |                     |                                   |        | H→L+1                    | -0.30807        |          |
|                                            |                                                                                     |                                |                     |                                   |        | H→L+1                    | -0.30807        |          |
| <b>1b<sup>+</sup>-ii</b>                   | S <sub>0</sub> →S <sub>1</sub>                                                      | 1.76                           | 704                 | 702                               | 0.4258 | H-1→L                    | 0.44039         |          |
|                                            |                                                                                     |                                |                     |                                   |        | H→L                      | 0.54760         |          |
|                                            |                                                                                     |                                |                     |                                   |        | H→L                      | 0.54760         |          |
|                                            | S <sub>0</sub> →S <sub>2</sub>                                                      | 1.95                           | 635                 |                                   | 0.9617 | H-2→L                    | 0.16250         |          |
|                                            |                                                                                     |                                |                     |                                   |        | H-1→L                    | 0.52590         |          |
|                                            |                                                                                     |                                |                     |                                   |        | H→L                      | -0.43315        |          |
|                                            | S <sub>0</sub> →S <sub>3</sub>                                                      | 2.34                           | 529                 |                                   | 0.1490 | H-2→L                    | 0.62225         |          |
|                                            |                                                                                     |                                |                     |                                   |        | H→L+1                    | 0.29875         |          |
|                                            |                                                                                     |                                |                     |                                   |        | H→L+1                    | 0.29875         |          |
| <b>1c<sup>+</sup>-i, 1c<sup>+</sup>-ii</b> | S <sub>0</sub> →S <sub>1</sub>                                                      | 1.76                           | 703                 |                                   | 0.5880 | H-1→L                    | -0.14753        |          |
|                                            |                                                                                     |                                |                     |                                   |        | H→L                      | 0.67363         |          |
|                                            |                                                                                     |                                |                     |                                   |        | H→L+1                    | 0.13549         |          |
|                                            | S <sub>0</sub> →S <sub>2</sub>                                                      | 1.89                           | 656                 | 583                               | 0.9505 | H-1→L                    | 0.67754         |          |
|                                            |                                                                                     |                                |                     |                                   |        | H→L                      | 0.16885         |          |
|                                            |                                                                                     |                                |                     |                                   |        | H→L                      | 0.16885         |          |
|                                            | <b>1c<sup>+</sup>-i + H<sup>+</sup></b><br><b>1c<sup>+</sup>-ii + H<sup>+</sup></b> | S <sub>0</sub> →S <sub>1</sub> | 1.84                | 674                               | 668    | 0.9585                   | H-1→L           | -0.10442 |
|                                            |                                                                                     |                                |                     |                                   |        |                          | H→L             | 0.69856  |
|                                            |                                                                                     | S <sub>0</sub> →S <sub>2</sub> | 2.11                | 588                               |        | 0.1557                   | H-1→L           | 0.64355  |
|                                            |                                                                                     |                                |                     |                                   | H→L    | -0.27374                 |                 |          |

<sup>a</sup> Oscillator strength. <sup>b</sup> H stands for HOMO and L stands for LUMO. <sup>c</sup> Coefficient of the wave function for each excitations.

**Table S3** Selected parameters for emission related of dyes **1a<sup>+</sup>-c<sup>+</sup>** and **1c<sup>+</sup>+H<sup>+</sup>** based on the optimized lowest singlet excited state geometries in water.

| dyes                                                                                | Electronic transitions         | Excitation energy |                     | $\lambda_{\text{exp.}}/\text{nm}$ | $f^a$  | Composition <sup>b</sup> | CI <sup>c</sup> |          |
|-------------------------------------------------------------------------------------|--------------------------------|-------------------|---------------------|-----------------------------------|--------|--------------------------|-----------------|----------|
|                                                                                     |                                | E/eV              | $\lambda/\text{nm}$ |                                   |        |                          |                 |          |
| <b>1a<sup>+</sup>-i</b>                                                             | S <sub>0</sub> →S <sub>1</sub> | 0.99              | 1253                |                                   | 0.0001 | H→L                      | 0.70704         |          |
|                                                                                     | S <sub>0</sub> →S <sub>2</sub> | 1.79              | 692                 | 749                               | 0.6541 | H-2→L                    | 0.24650         |          |
|                                                                                     |                                |                   |                     |                                   |        | H-1→L                    | 0.66110         |          |
|                                                                                     | S <sub>0</sub> →S <sub>3</sub> | 2.22              | 557                 |                                   |        | 0.6188                   | H-2→L           | 0.63765  |
| H-1→L                                                                               |                                |                   |                     |                                   |        |                          | -0.25265        |          |
| <b>1a<sup>+</sup>-ii</b>                                                            | S <sub>0</sub> →S <sub>1</sub> | 1.44              | 859                 |                                   | 0.2754 | H-1→L                    | 0.48779         |          |
|                                                                                     | S <sub>0</sub> →S <sub>2</sub> | 1.82              | 683                 | 749                               | 0.8649 | H→L                      | 0.51099         |          |
|                                                                                     |                                |                   |                     |                                   |        | H-1→L                    | 0.50836         |          |
| <b>1b<sup>+</sup>-i</b>                                                             | S <sub>0</sub> →S <sub>1</sub> | 1.58              | 786                 |                                   | 0.1911 | H-1→L                    | 0.64202         |          |
|                                                                                     | S <sub>0</sub> →S <sub>2</sub> | 1.70              | 728                 | 736                               | 0.6799 | H→L                      | -0.28502        |          |
|                                                                                     |                                |                   |                     |                                   |        | H-2→L                    | -0.21337        |          |
|                                                                                     |                                |                   |                     |                                   |        | H-1→L                    | 0.26429         |          |
|                                                                                     | S <sub>0</sub> →S <sub>3</sub> | 2.32              | 534                 |                                   | 0.8169 | H→L                      | 0.61837         |          |
|                                                                                     |                                |                   |                     |                                   |        | H-2→L                    | 0.62598         |          |
| <b>1b<sup>+</sup>-ii</b>                                                            | S <sub>0</sub> →S <sub>1</sub> | 0.98              | 1264                |                                   | 0.0000 | H→L                      | 0.70710         |          |
|                                                                                     | S <sub>0</sub> →S <sub>2</sub> | 1.80              | 687                 | 736                               | 0.7395 | H-2→L                    | 0.27270         |          |
|                                                                                     |                                |                   |                     |                                   |        | H-1→L                    | 0.64718         |          |
| <b>1c<sup>+</sup>-i, 1c<sup>+</sup>-ii</b>                                          | S <sub>0</sub> →S <sub>1</sub> | 0.69              | 1804                |                                   | 0.0000 | H→L                      | 0.70710         |          |
|                                                                                     | S <sub>0</sub> →S <sub>2</sub> | 1.80              | 689                 | 691                               | 0.7900 | H-2→L                    | 0.19666         |          |
| <b>1c<sup>+</sup>-j + H<sup>+</sup></b><br><b>1c<sup>+</sup>-ii + H<sup>+</sup></b> | S <sub>0</sub> →S <sub>1</sub> | 0.76              | 1641                |                                   | 0.0000 | H→L                      | 0.67687         |          |
|                                                                                     | S <sub>0</sub> →S <sub>2</sub> | 1.96              | 631                 | 719                               | 0.0078 | H-2→L                    | 0.69752         |          |
|                                                                                     |                                |                   |                     |                                   |        | H-1→L                    | 0.11469         |          |
|                                                                                     | S <sub>0</sub> →S <sub>3</sub> | 2.02              | 615                 |                                   |        | 0.3000                   | H-2→L           | -0.11572 |
|                                                                                     |                                |                   |                     |                                   |        |                          | H-1→L           | 0.68645  |
|                                                                                     | S <sub>0</sub> →S <sub>8</sub> | 2.85              | 435                 |                                   |        | 0.4055                   | H→L+1           | 0.57753  |
|                                                                                     |                                |                   |                     |                                   |        |                          | H→L+2           | 0.24345  |
|                                                                                     |                                |                   |                     |                                   |        |                          | H→L+3           | 0.13786  |
| H→L+4                                                                               |                                |                   |                     |                                   |        |                          | 0.25217         |          |

<sup>a</sup> Oscillator strength. <sup>b</sup> H stands for HOMO and L stands for LUMO. <sup>c</sup> Coefficient of the wave function for each excitations.

## 4. Appendix

 $^1\text{H}$  NMR (400 MHz,  $\text{CDCl}_3$ )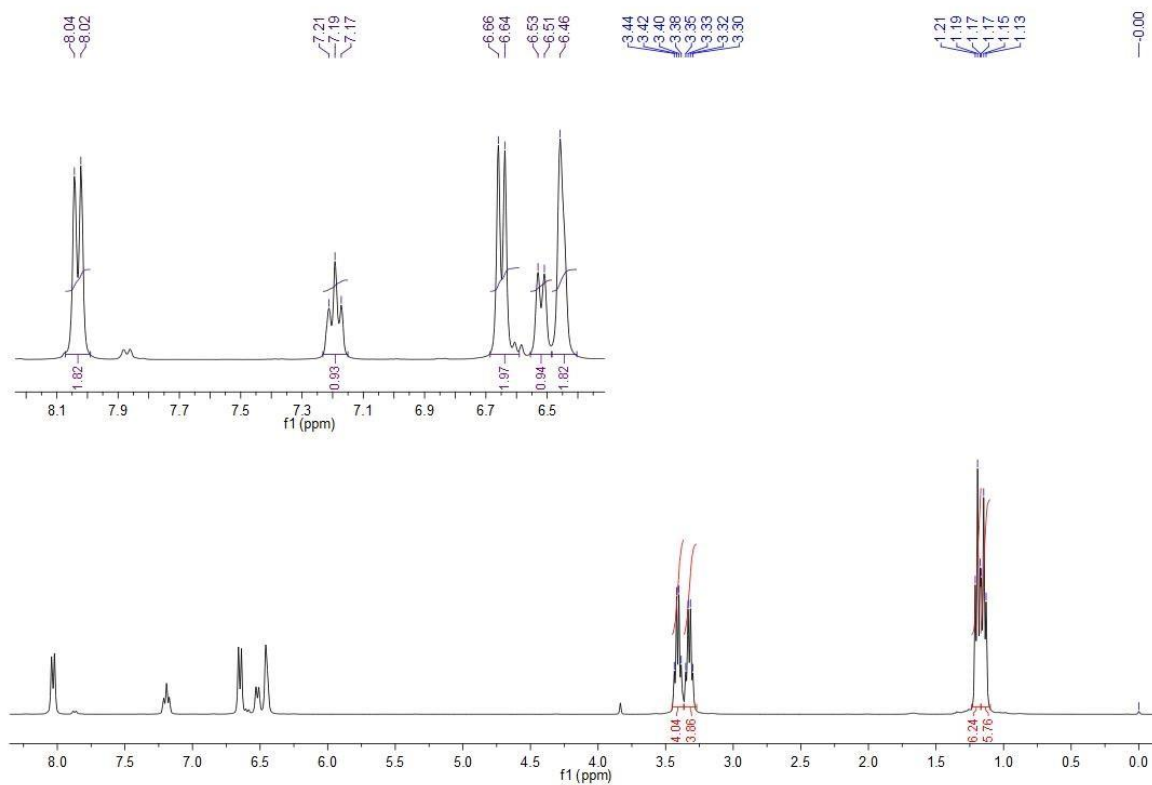Fig. S7  $^1\text{H}$  NMR of 3. $^{13}\text{C}$  NMR (151 MHz,  $\text{CDCl}_3$ )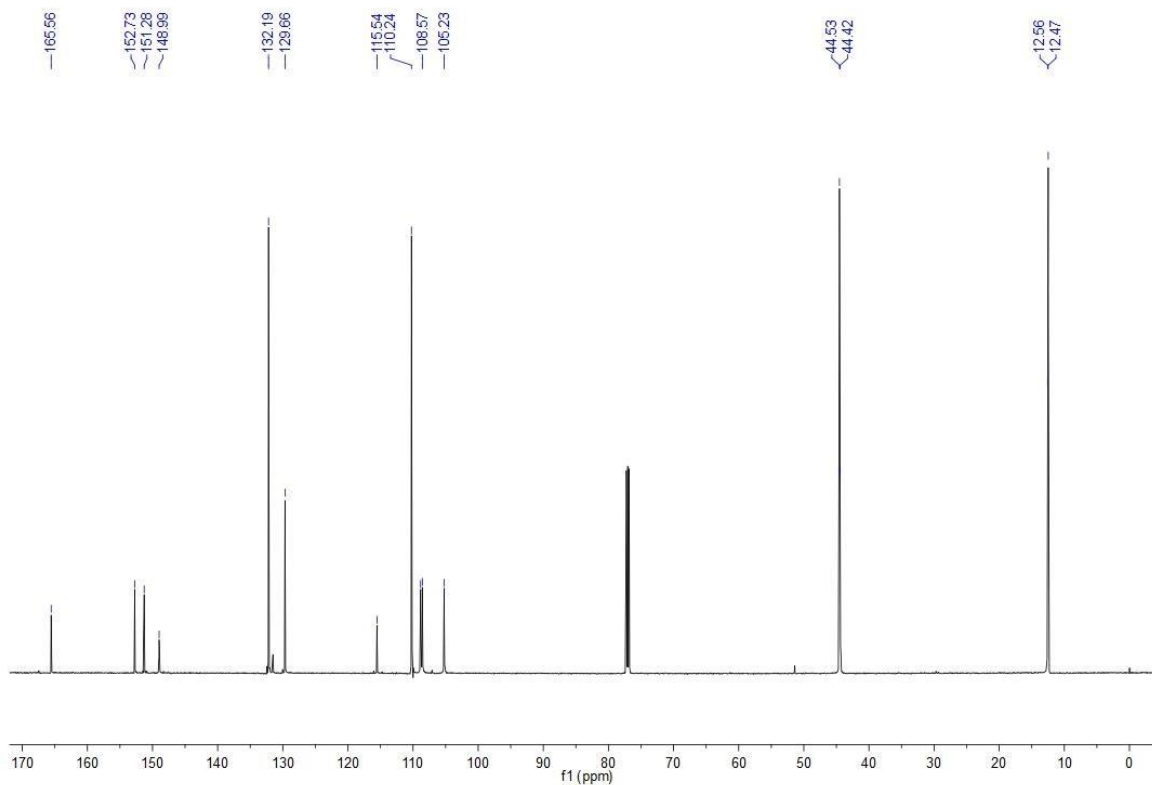Fig. S8  $^{13}\text{C}$  NMR of 3.

## Display Report

**Analysis Info**  
Analysis Name D:\Data\YYG\CZH\20160428\1\_RA1\_01\_1140.d  
Method 20160429-0.6MLMIN.m  
Sample Name 1  
Comment  
Acquisition Date 4/28/2016 2:18:40 PM  
Operator bruker  
Instrument micrOTOF-Q III 8228888.20487

**Acquisition Parameter**

|             |            |                       |           |                  |           |
|-------------|------------|-----------------------|-----------|------------------|-----------|
| Source Type | ESI        | Ion Polarity          | Positive  | Set Nebulizer    | 0.4 Bar   |
| Focus       | Not active | Set Capillary         | 4500 V    | Set Dry Heater   | 120 °C    |
| Scan Begin  | 50 m/z     | Set End Plate Offset  | -500 V    | Set Dry Gas      | 4.0 l/min |
| Scan End    | 3000 m/z   | Set Collision Cell RF | 300.0 Vpp | Set Divert Valve | Waste     |

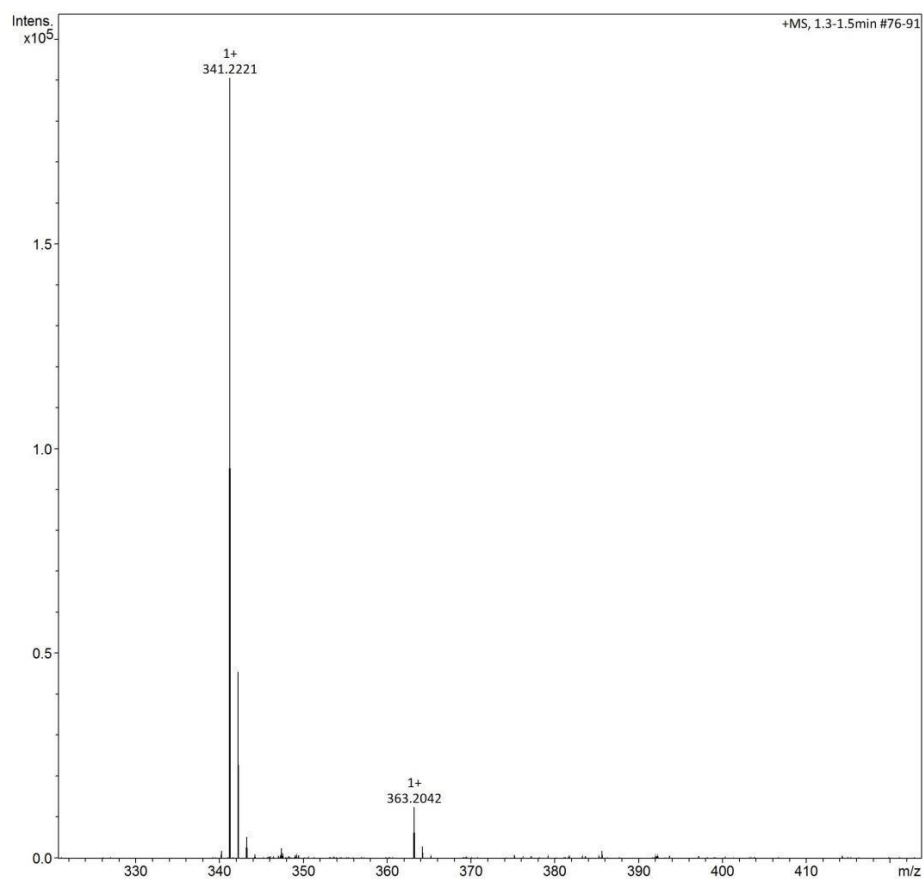

Bruker Compass DataAnalysis 4.2 printed: 4/28/2016 2:31:29 PM by: bruker Page 1 of 1

**Fig. S9** HRMS(ESI<sup>+</sup>) of **3**.

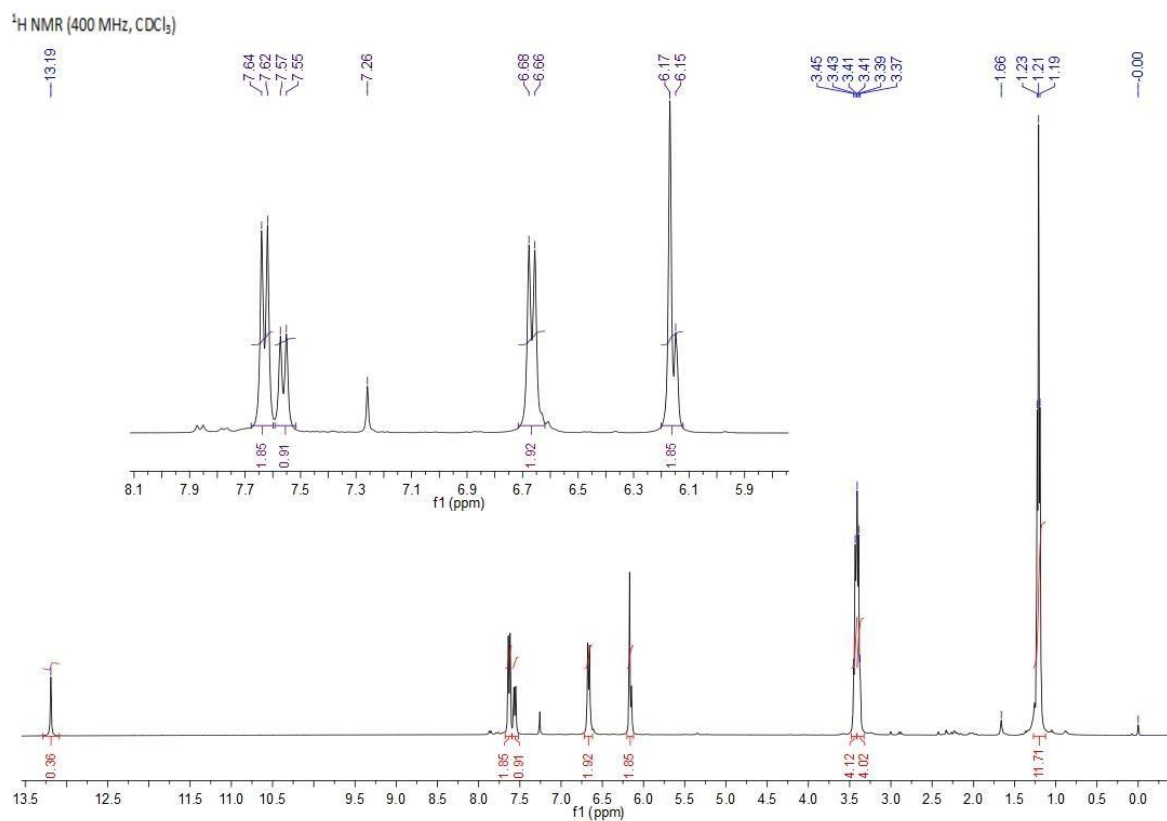Fig. S10  $^1\text{H}$  NMR of **4**.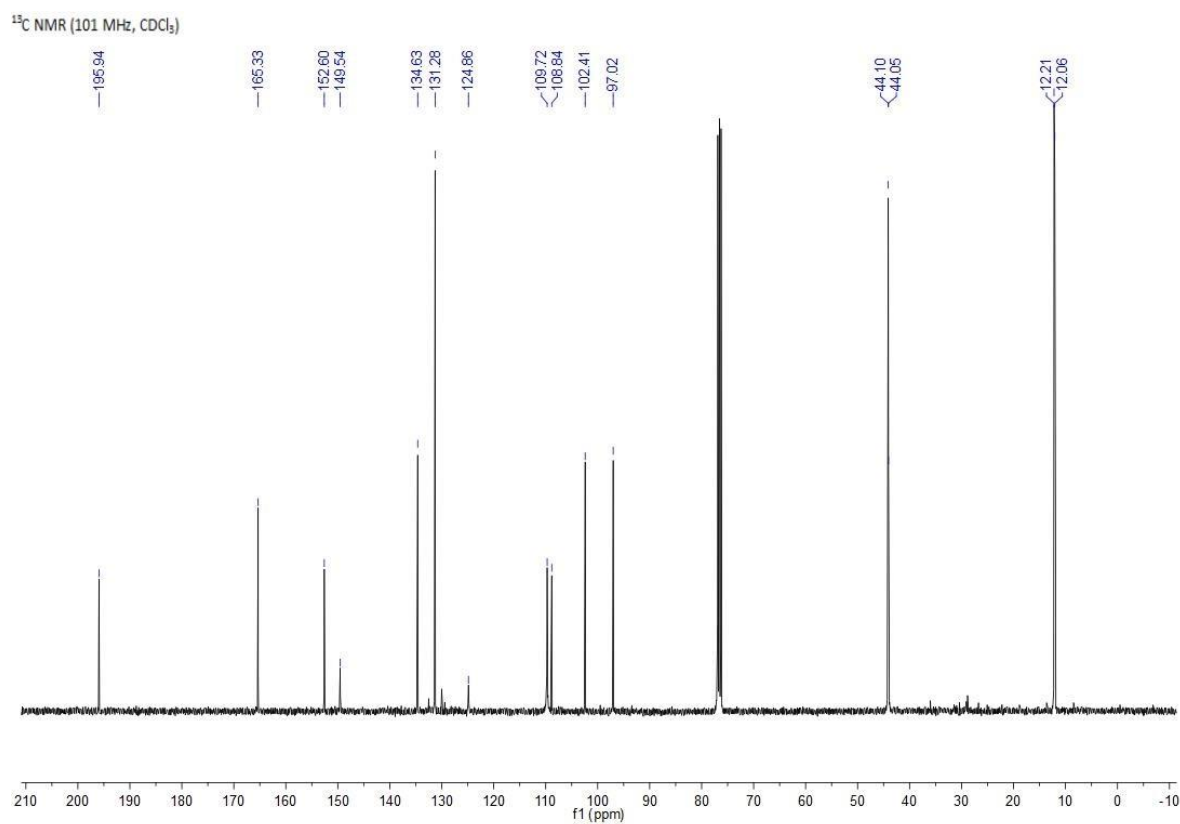Fig. S11  $^{13}\text{C}$  NMR of **4**.

## Display Report

**Analysis Info**  
Analysis Name D:\Data\LJM\WXL\20160401\X4\_GA8\_01\_523.d  
Method 20160309-Icms-190-400nm.m  
Sample Name X4  
Comment  
Acquisition Date 4/1/2016 9:55:16 AM  
Operator bruker  
Instrument micrOTOF-Q III 8228888.20487

**Acquisition Parameter**

|             |            |                       |           |                  |           |
|-------------|------------|-----------------------|-----------|------------------|-----------|
| Source Type | ESI        | Ion Polarity          | Positive  | Set Nebulizer    | 0.4 Bar   |
| Focus       | Not active | Set Capillary         | 4500 V    | Set Dry Heater   | 120 °C    |
| Scan Begin  | 50 m/z     | Set End Plate Offset  | -500 V    | Set Dry Gas      | 4.0 l/min |
| Scan End    | 3000 m/z   | Set Collision Cell RF | 300.0 Vpp | Set Divert Valve | Waste     |

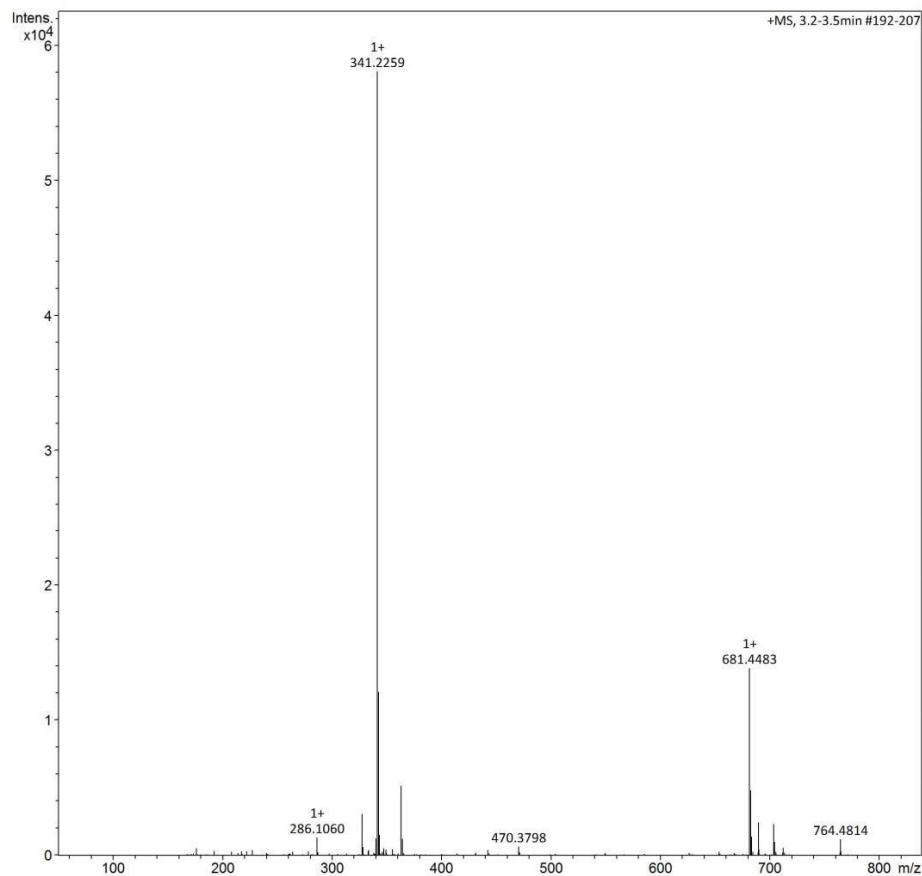

Bruker Compass DataAnalysis 4.2 printed: 4/6/2016 8:43:47 AM by: bruker Page 1 of 1

**Fig. S12** HRMS(ESI<sup>+</sup>) of **4**.

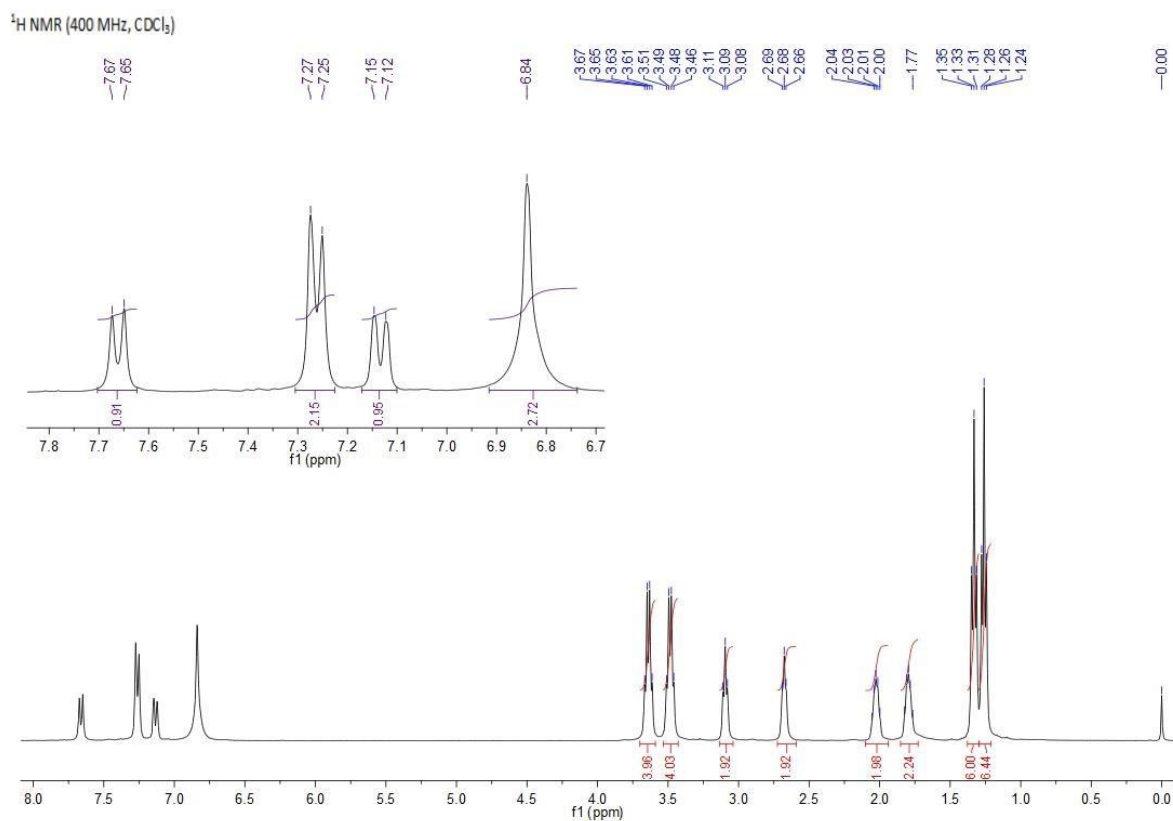Fig. S13  $^1\text{H}$  NMR of 5.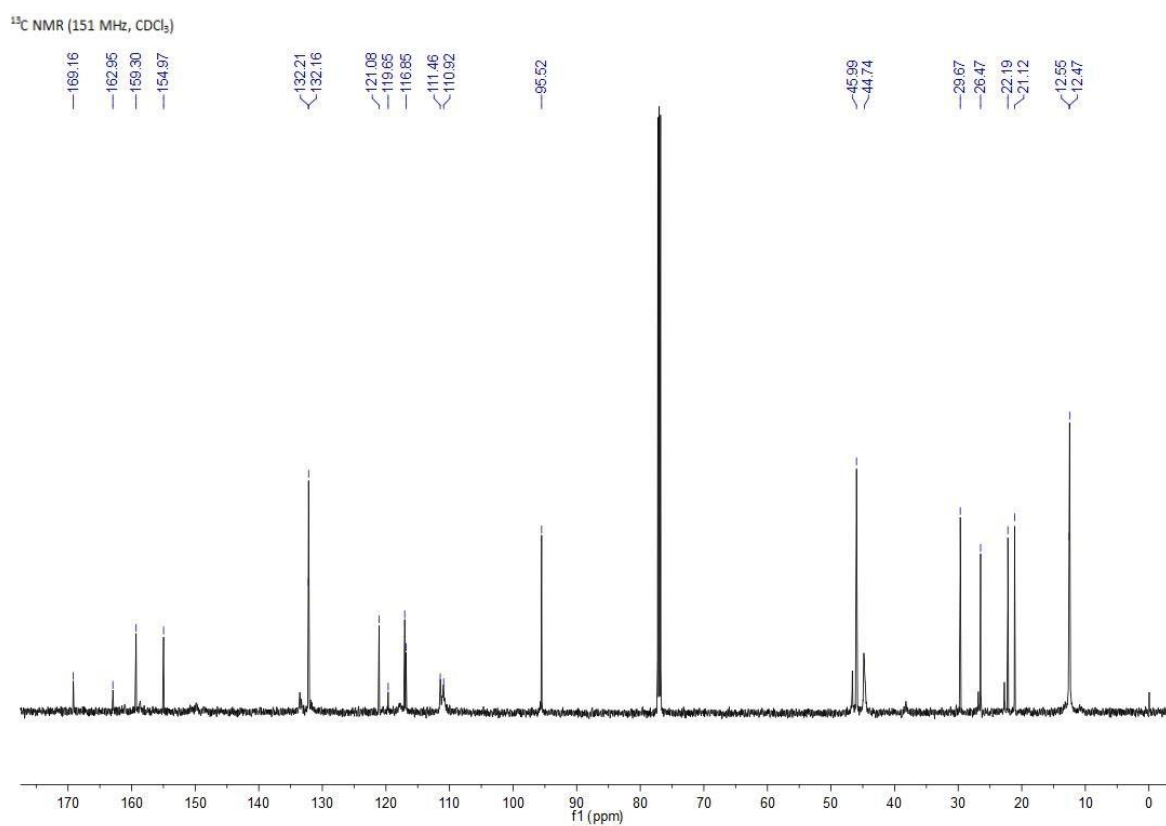Fig. S14  $^{13}\text{C}$  NMR of 5.

## Display Report

|                              |                                    |                                       |                              |                  |           |
|------------------------------|------------------------------------|---------------------------------------|------------------------------|------------------|-----------|
| <b>Analysis Info</b>         |                                    | Acquisition Date 4/14/2016 3:38:58 PM |                              |                  |           |
| Analysis Name                | D:\Data\SB\zyj\20160414\LQ-1-NEG.d | Operator                              | bruker                       |                  |           |
| Method                       | tune_low_neg.m                     | Instrument                            | micrOTOF-Q III 8228888.20487 |                  |           |
| Sample Name                  | SAM                                | Comment                               |                              |                  |           |
| <b>Acquisition Parameter</b> |                                    |                                       |                              |                  |           |
| Source Type                  | ESI                                | Ion Polarity                          | Negative                     | Set Nebulizer    | 0.3 Bar   |
| Focus                        | Active                             | Set Capillary                         | 2500 V                       | Set Dry Heater   | 180 °C    |
| Scan Begin                   | 50 m/z                             | Set End Plate Offset                  | -500 V                       | Set Dry Gas      | 4.0 l/min |
| Scan End                     | 3000 m/z                           | Set Collision Cell RF                 | 200.0 Vpp                    | Set Divert Valve | Waste     |

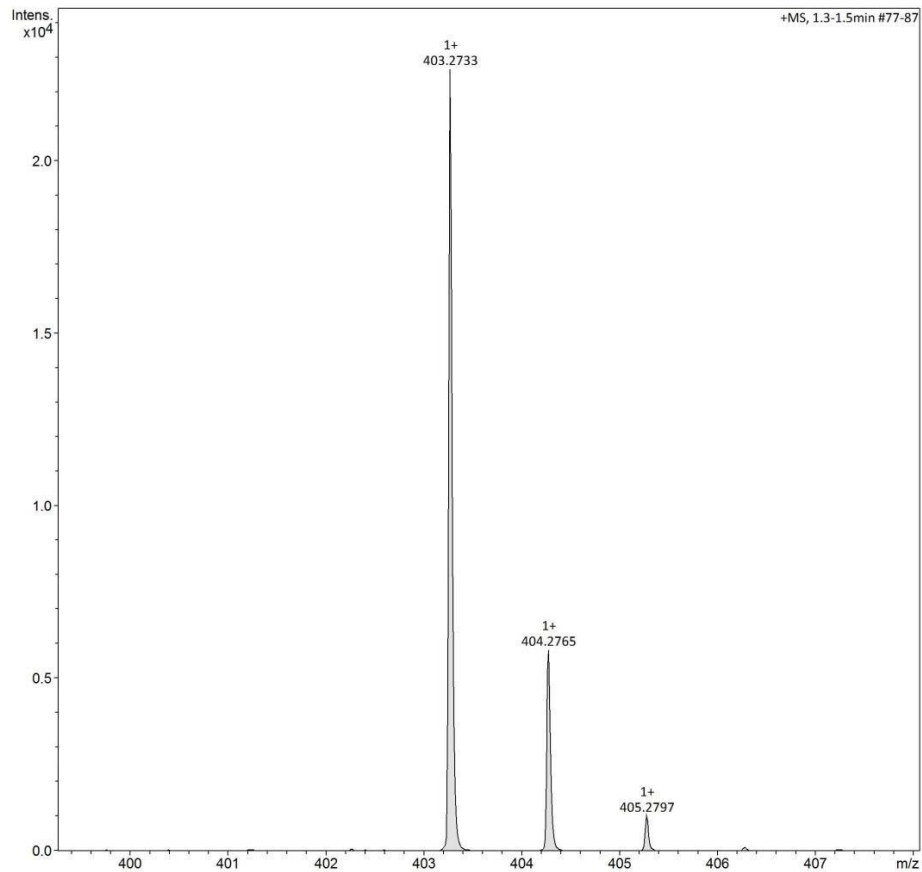

Bruker Compass DataAnalysis 4.2 printed: 4/15/2016 3:20:54 PM by: bruker Page 1 of 1

Fig. S15 HRMS(ESI+) of 5.



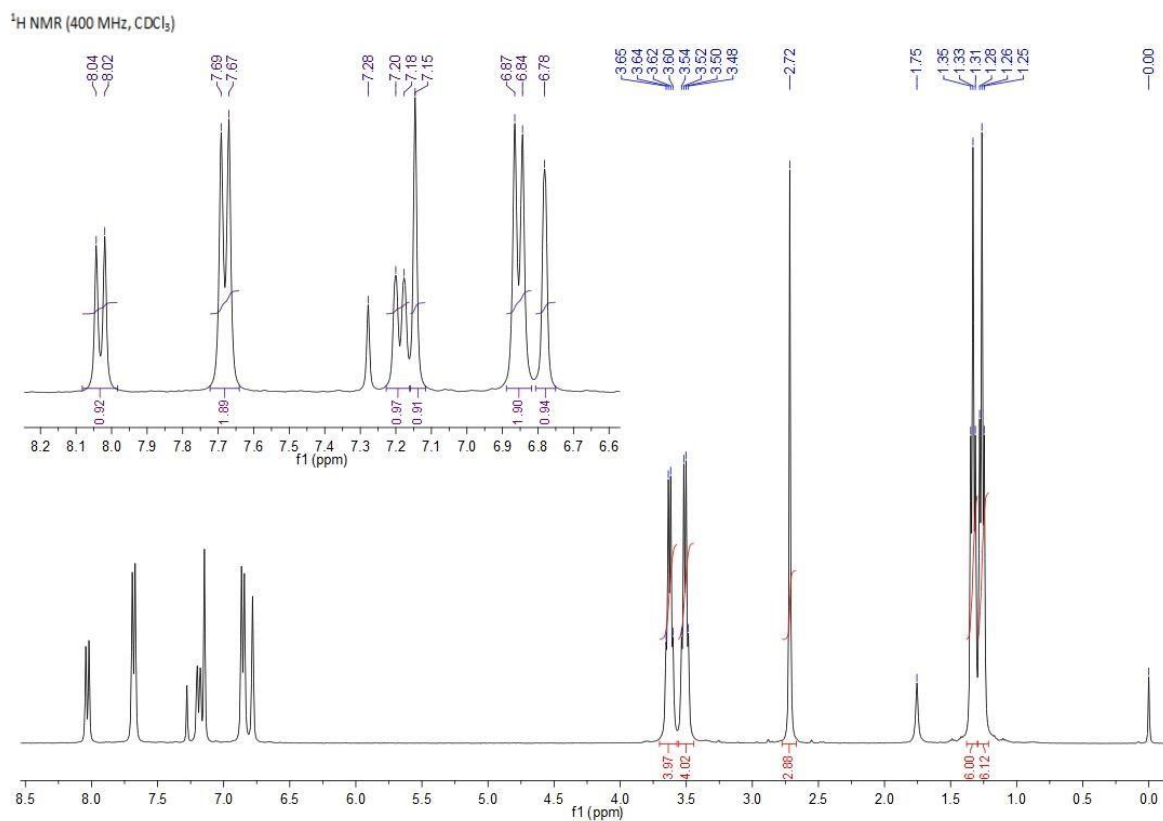Fig. S16  $^1\text{H}$  NMR of **6**.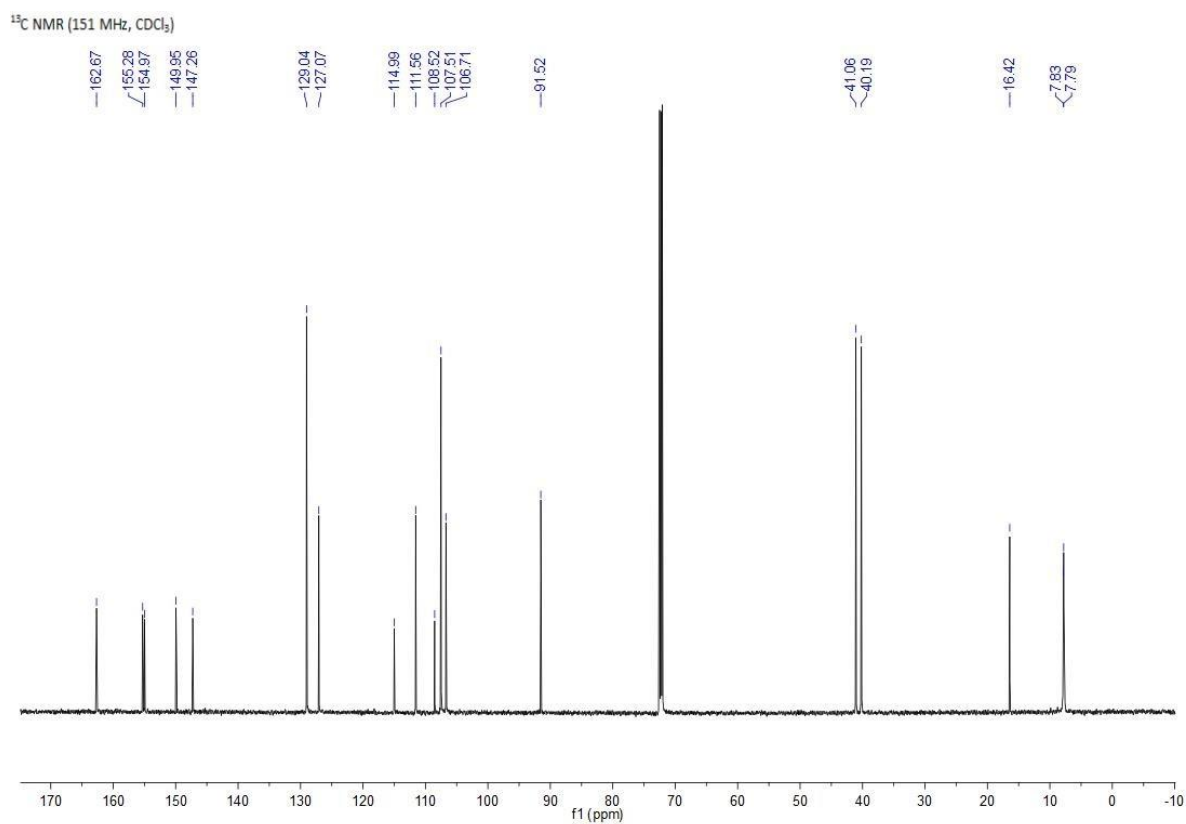Fig. S17  $^{13}\text{C}$  NMR of **6**.

## Display Report

**Analysis Info**  
Analysis Name D:\Data\LJMFJX\20160318\X-2\_RA8\_01\_240.d  
Method 20160309-Icms-190-400nm.m  
Sample Name X-2  
Comment  
Acquisition Date 3/18/2016 4:05:51 PM  
Operator bruker  
Instrument micrOTOF-Q III 8228888.20487

**Acquisition Parameter**

|             |            |                       |           |                  |           |
|-------------|------------|-----------------------|-----------|------------------|-----------|
| Source Type | ESI        | Ion Polarity          | Positive  | Set Nebulizer    | 0.4 Bar   |
| Focus       | Not active | Set Capillary         | 4500 V    | Set Dry Heater   | 120 °C    |
| Scan Begin  | 50 m/z     | Set End Plate Offset  | -500 V    | Set Dry Gas      | 4.0 l/min |
| Scan End    | 3000 m/z   | Set Collision Cell RF | 300.0 Vpp | Set Divert Valve | Waste     |

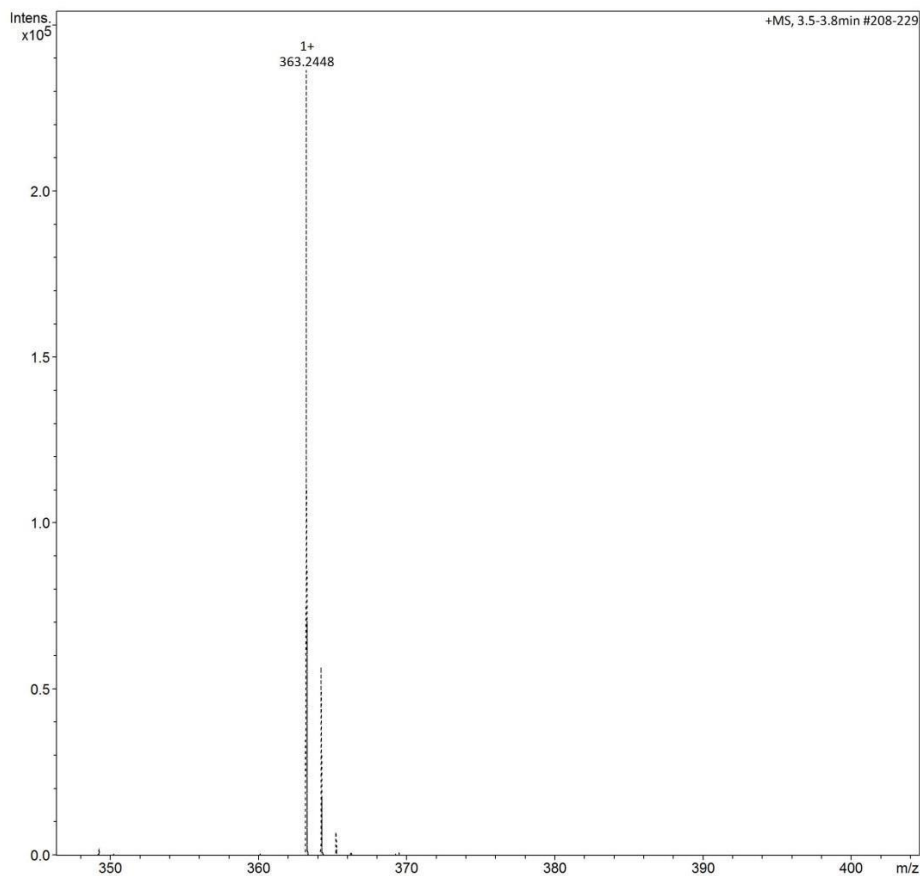

Bruker Compass DataAnalysis 4.2 printed: 3/18/2016 4:33:47 PM by: bruker Page 1 of 1

**Fig. S18** HRMS(ESI<sup>+</sup>) of **6**.

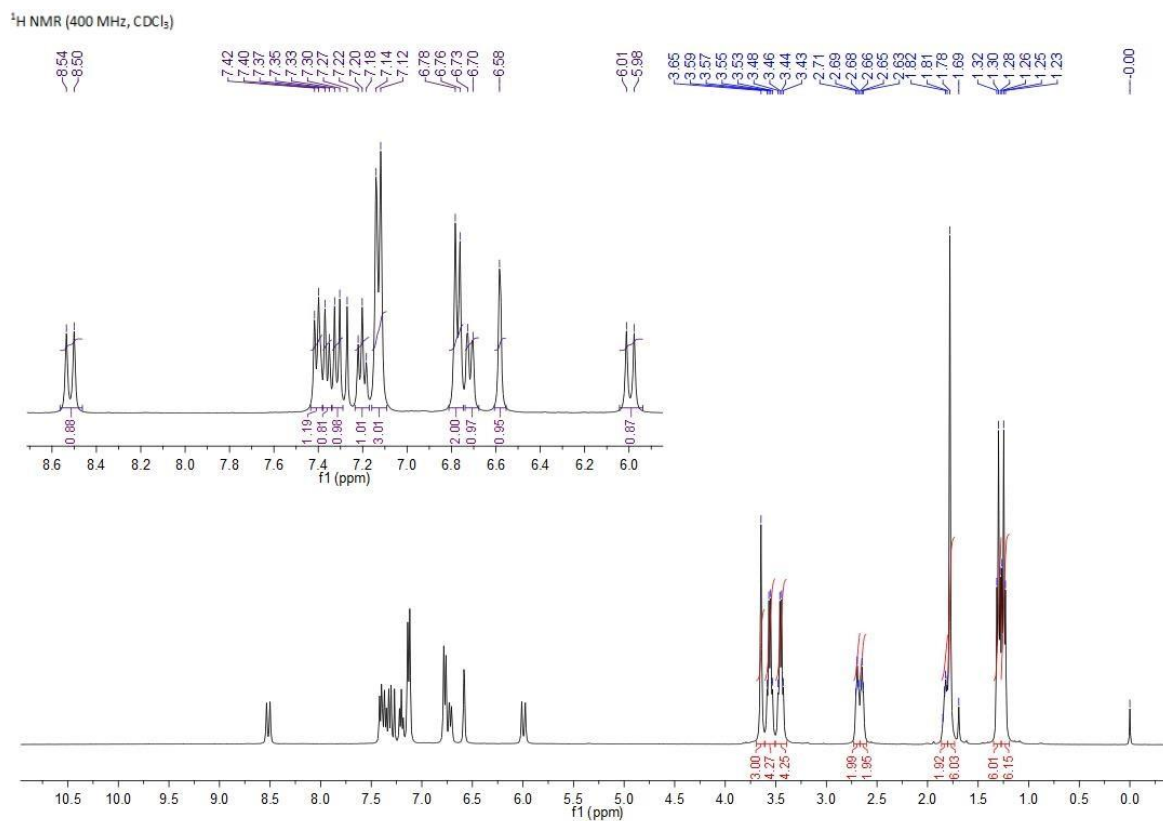Fig. S19  $^1\text{H}$  NMR of dye **1a**.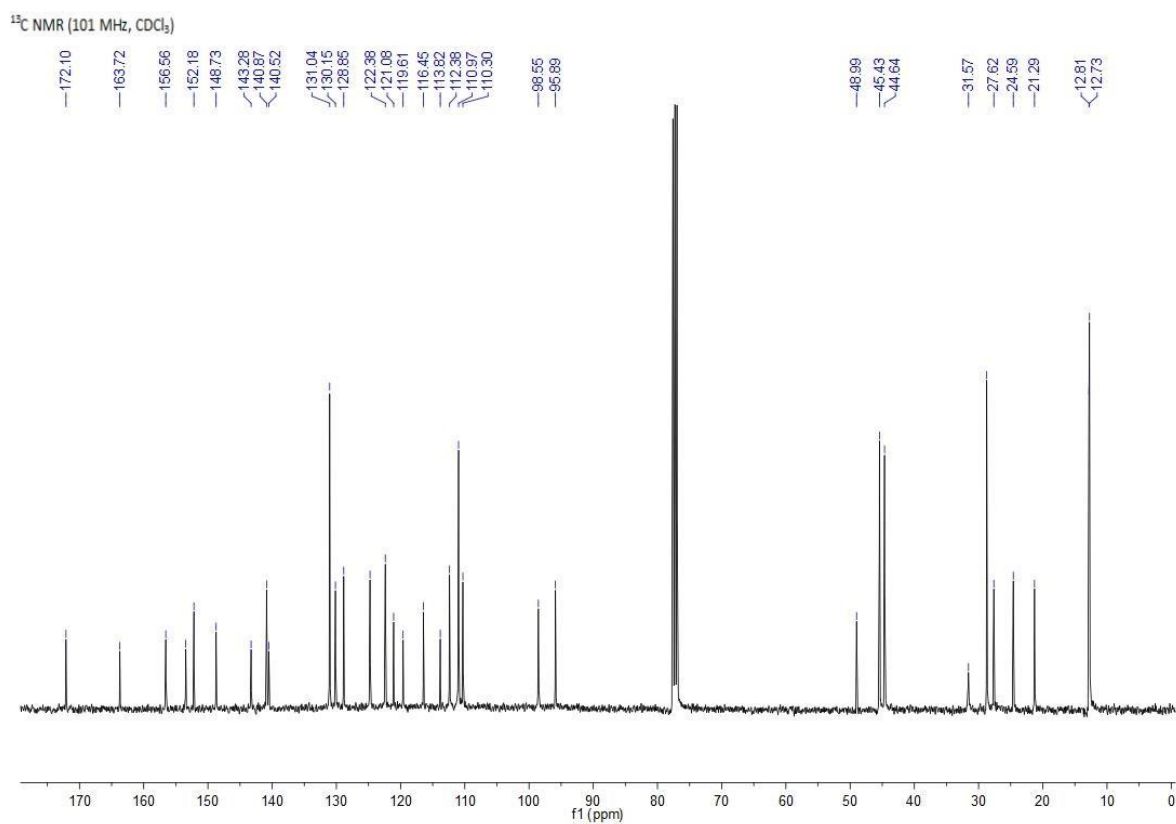Fig. S20  $^{13}\text{C}$  NMR of dye **1a**.

## Display Report

|                      |                                          |                  |                              |
|----------------------|------------------------------------------|------------------|------------------------------|
| <b>Analysis Info</b> |                                          | Acquisition Date | 3/18/2016 4:05:51 PM         |
| Analysis Name        | D:\Data\LJMFJX\20160318\X-2_RA8_01_240.d | Operator         | bruker                       |
| Method               | 20160309-lcms-190-400nm.m                | Instrument       | micrOTOF-Q III 8228888.20487 |
| Sample Name          | X-2                                      |                  |                              |
| Comment              |                                          |                  |                              |

|                              |            |                       |           |                  |           |
|------------------------------|------------|-----------------------|-----------|------------------|-----------|
| <b>Acquisition Parameter</b> |            |                       |           |                  |           |
| Source Type                  | ESI        | Ion Polarity          | Positive  | Set Nebulizer    | 0.4 Bar   |
| Focus                        | Not active | Set Capillary         | 4500 V    | Set Dry Heater   | 120 °C    |
| Scan Begin                   | 50 m/z     | Set End Plate Offset  | -500 V    | Set Dry Gas      | 4.0 l/min |
| Scan End                     | 3000 m/z   | Set Collision Cell RF | 300.0 Vpp | Set Divert Valve | Waste     |

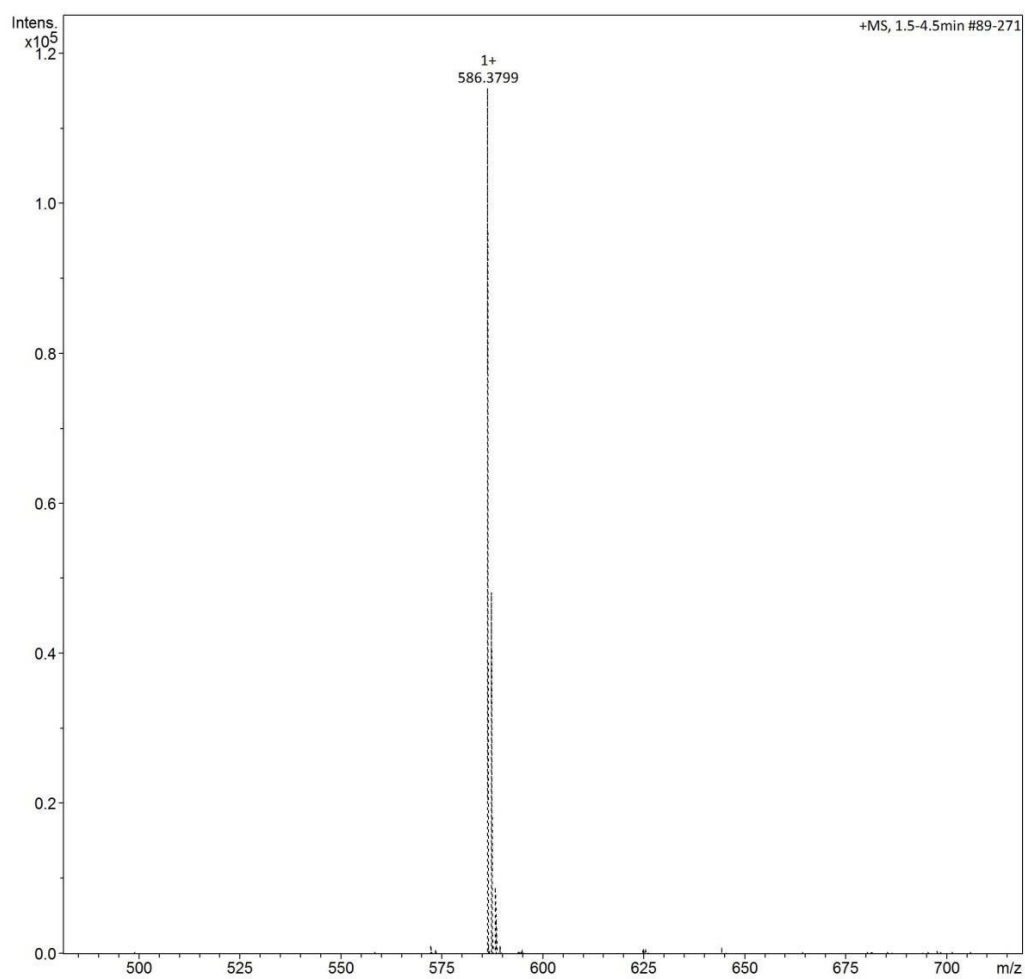

Bruker Compass DataAnalysis 4.2 printed: 3/18/2016 4:33:18 PM by: bruker Page 1 of 1

**Fig. S21** HRMS(ESI<sup>+</sup>) of dye **1a**.

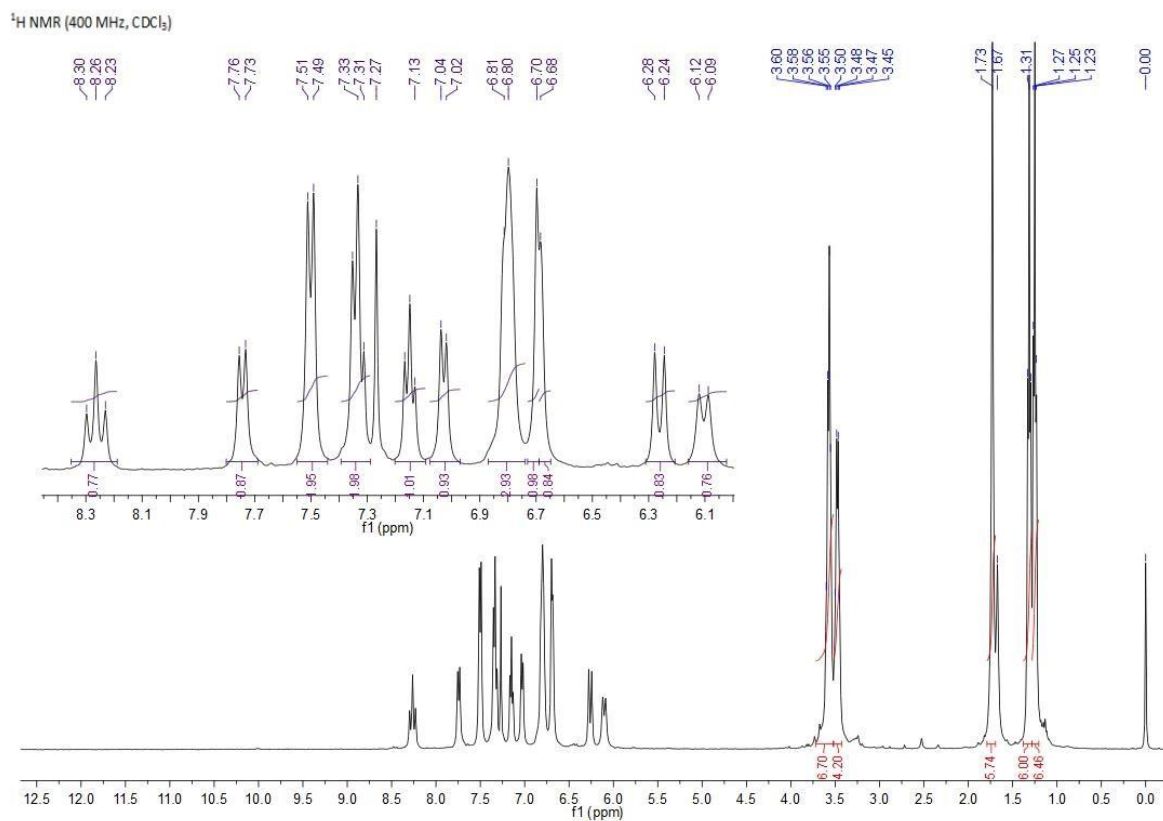Fig. S22  $^1\text{H}$  NMR of dye **1b**.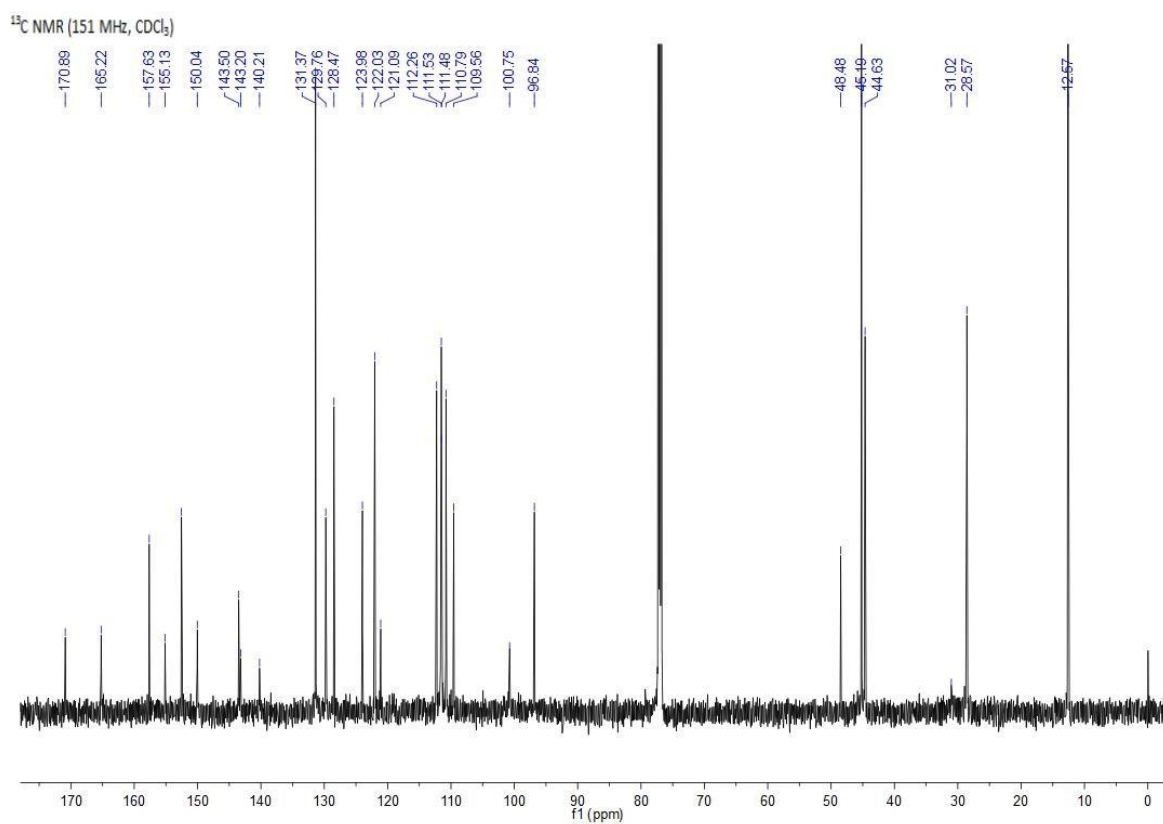Fig. S23  $^{13}\text{C}$  NMR of dye **1b**.

## Display Report

## Analysis Info

Analysis Name D:\Data\SB\zyj\20160414\LQ-1-NEG.d  
Method tune\_low\_neg.m  
Sample Name SAM  
Comment

Acquisition Date 4/14/2016 3:38:58 PM

Operator bruker  
Instrument micrOTOF-Q III 8228888.20487

## Acquisition Parameter

|             |          |                       |           |                  |           |
|-------------|----------|-----------------------|-----------|------------------|-----------|
| Source Type | ESI      | Ion Polarity          | Negative  | Set Nebulizer    | 0.3 Bar   |
| Focus       | Active   | Set Capillary         | 2500 V    | Set Dry Heater   | 180 °C    |
| Scan Begin  | 50 m/z   | Set End Plate Offset  | -500 V    | Set Dry Gas      | 4.0 l/min |
| Scan End    | 3000 m/z | Set Collision Cell RF | 200.0 Vpp | Set Divert Valve | Waste     |

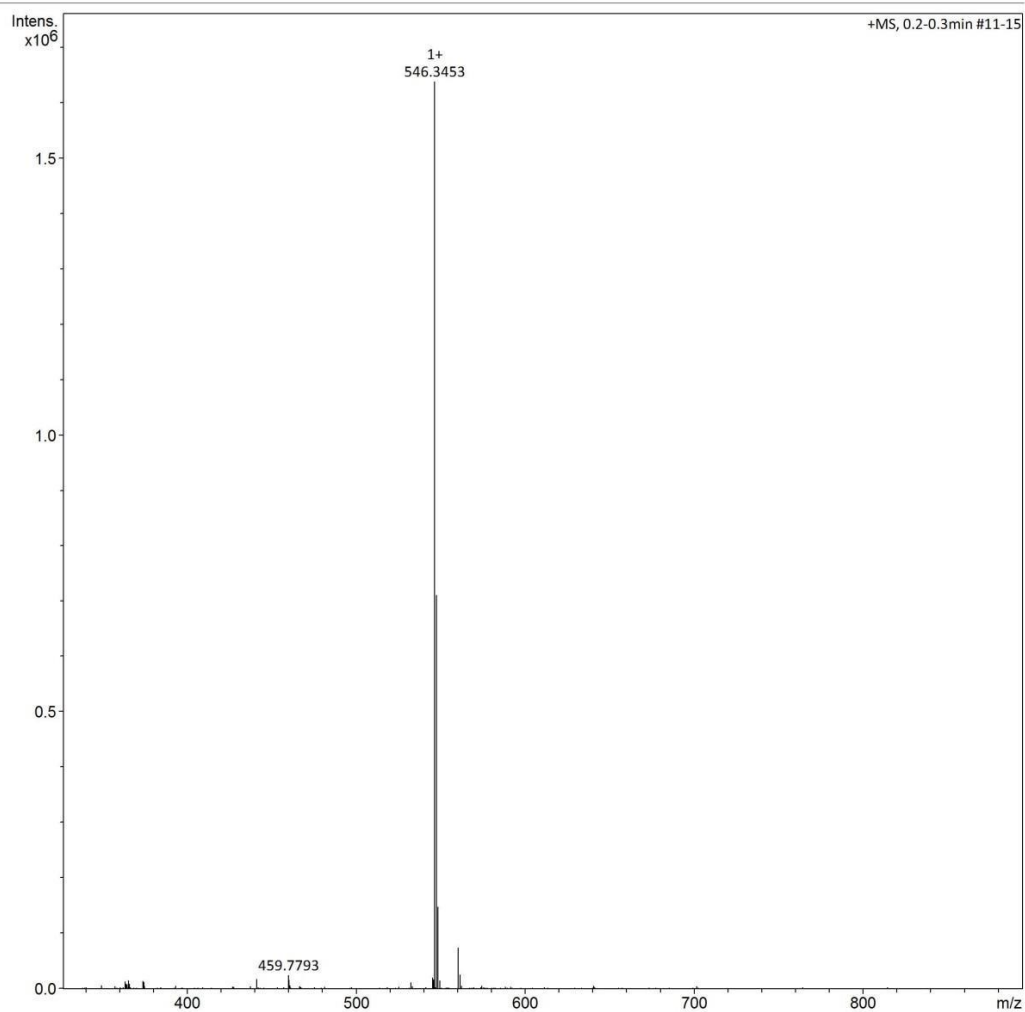

Bruker Compass DataAnalysis 4.2

printed: 4/15/2016 4:07:19 PM

by: bruker

Page 1 of 1

Fig. S24 HRMS(ESI<sup>+</sup>) of dye 1b.

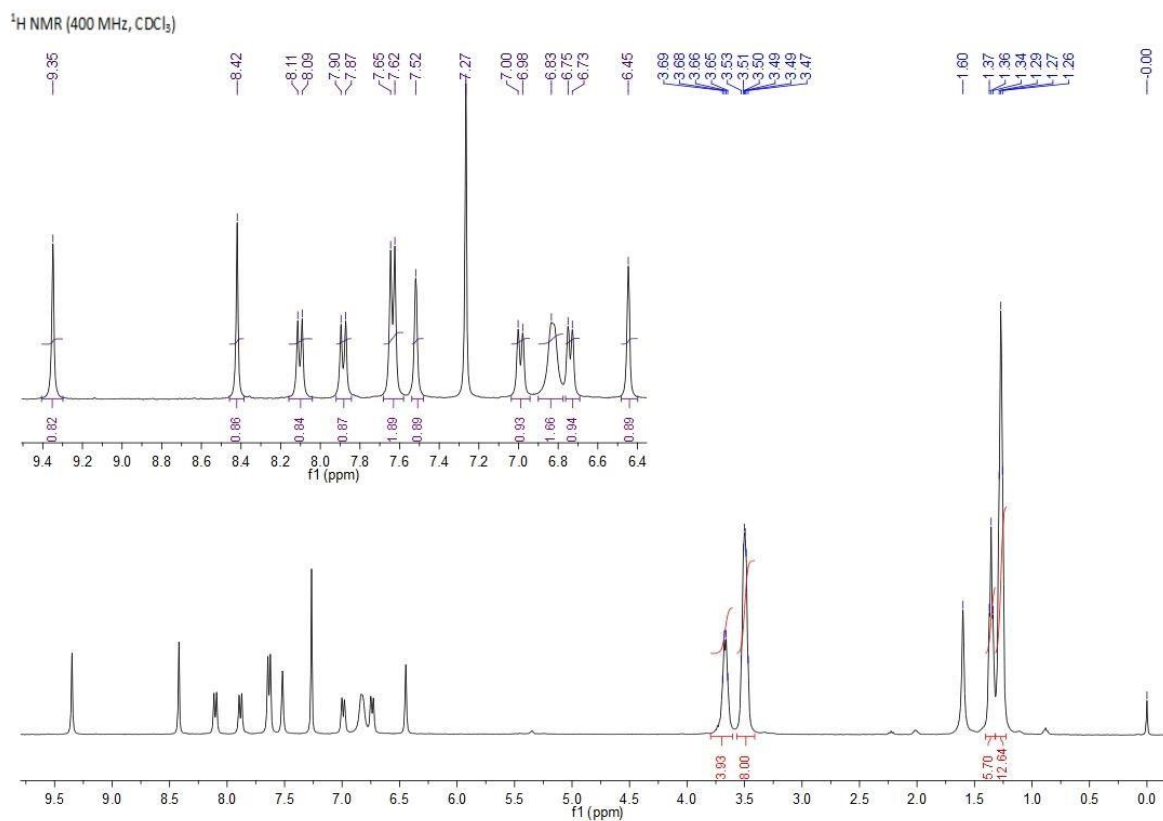Fig. S25  $^1\text{H}$  NMR of dye **1c**.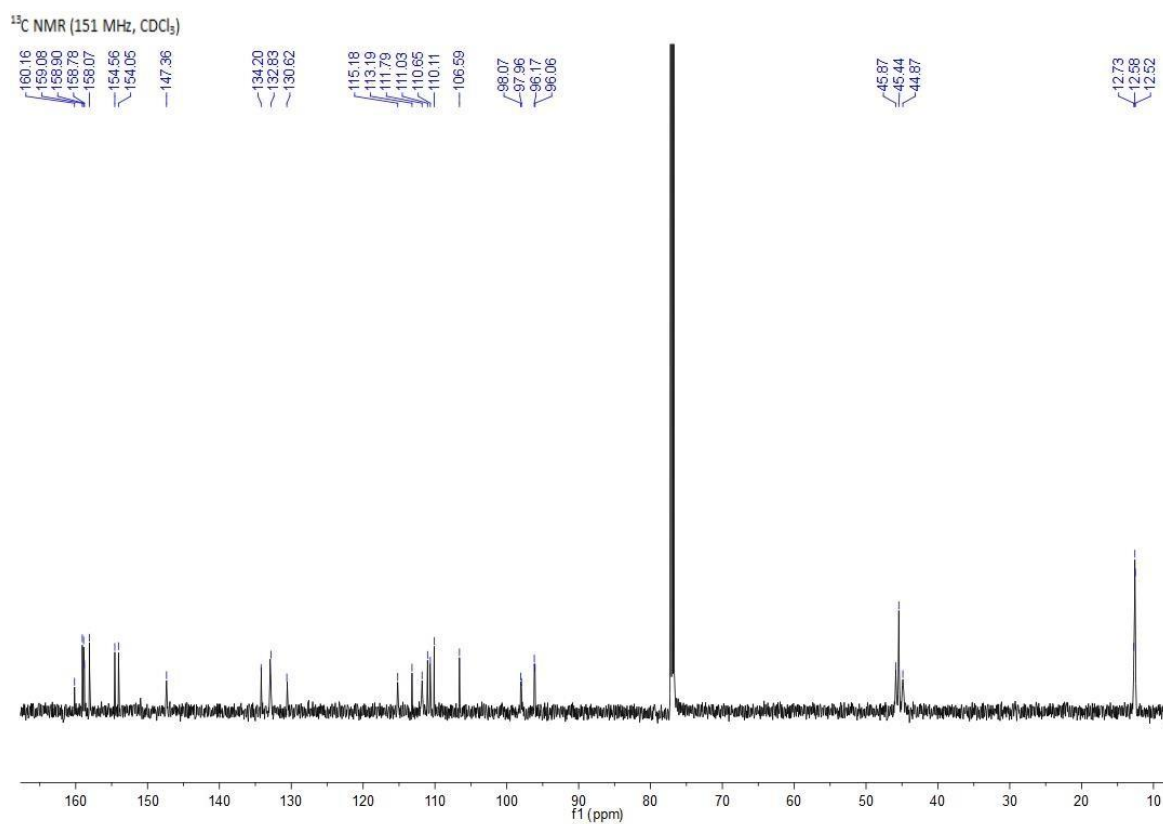Fig. S26  $^{13}\text{C}$  NMR of dye **1c**.

## Display Report

## Analysis Info

Analysis Name D:\Data\WXWZJQ\20160401\13\_GB7\_01\_530.d  
Method 20160309-lcms-190-400nm.m  
Sample Name 13  
Comment

Acquisition Date 4/1/2016 10:35:02 AM

Operator bruker  
Instrument micrOTOF-Q III 8228888.20487

## Acquisition Parameter

|             |            |                       |           |                  |           |
|-------------|------------|-----------------------|-----------|------------------|-----------|
| Source Type | ESI        | Ion Polarity          | Positive  | Set Nebulizer    | 0.4 Bar   |
| Focus       | Not active | Set Capillary         | 4500 V    | Set Dry Heater   | 120 °C    |
| Scan Begin  | 50 m/z     | Set End Plate Offset  | -500 V    | Set Dry Gas      | 4.0 l/min |
| Scan End    | 3000 m/z   | Set Collision Cell RF | 300.0 Vpp | Set Divert Valve | Waste     |

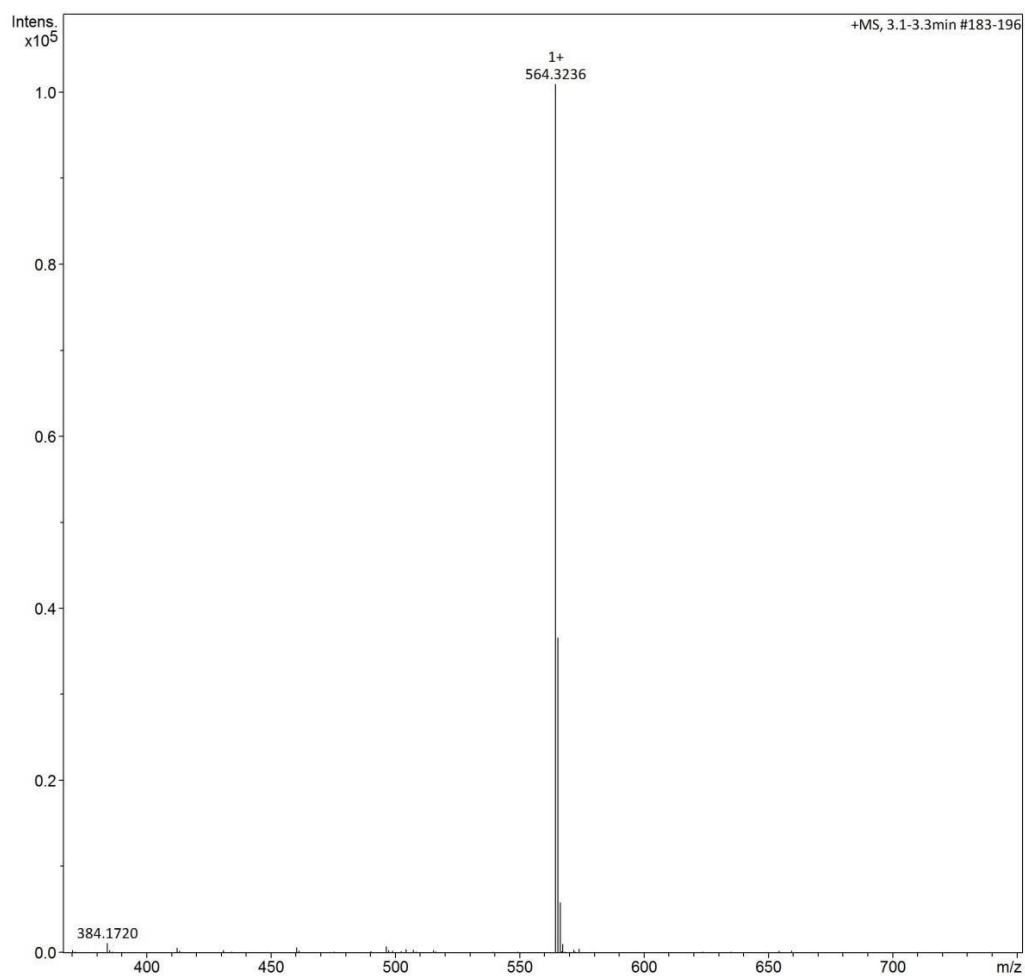Fig. S27 HRMS(ESI<sup>+</sup>) of dye 1c.
